# Supplementary material for: Effectiveness of Sports-Nutrition Education Based on Self-Determination Theory for Male University Rowing Athletes: A Randomized Controlled Trial
Source: Preprints.org preprint supplement (doi:10.20944/preprints202402.0366.v1), 2024-02-06
Supplement: Supplementary file 1 [file supplementary]

**Supplementary Material**

**Table S1.** Program Overview

|  |  |  | Before | Implementation period | | | | | | | | | | | | Immediately after | Continued  Evaluation | | |
| --- | --- | --- | --- | --- | --- | --- | --- | --- | --- | --- | --- | --- | --- | --- | --- | --- | --- | --- | --- |
|  | MONTH | | 1st | | | | 2nd | | | | 3rd | | | | 4th | 5th | 6th |
|  | DAY | | 5/30 | 6/13 | 6/20 | 6/27 | 7/4 | 7/10 7/11 | 7/18 | 7/25 | 8/1 | 8/7 8/8 | 8/15 | 8/22 | 8/29 | 9/4 | 10/2 | 10/30 | 11/27 |
|  | WEEK | | –2 | 0 | 1 | 2 | 3 | 4 | 5 | 6 | 7 | 8 | 9 | 10 | 11 | 12 | 16 | 20 | 24 |
| **Program Flow** | SDT group | Seminar（60 minutes） |  | ✔ |  |  |  | ✔ |  |  |  | ✔ |  |  |  |  |  |  |  |
| + worksheet（30 minutes） |  | ✔ |  |  |  | ✔ |  |  |  | ✔ |  |  |  |  |  |  |  |
| Share meal photos and your issues （Online Communication Tools） |  | ✔ | ✔ | ✔ | ✔ | ✔ | ✔ | ✔ | ✔ | ✔ | ✔ | ✔ | ✔ | ✔ |  |  |  |
| + follow-up (mail) |  | ✔ | ✔ | ✔ | ✔ | ✔ | ✔ | ✔ | ✔ | ✔ | ✔ | ✔ | ✔ | ✔ |  |  |  |
| COT group | Seminar（60 minutes） |  | ✔ |  |  |  | ✔ |  |  |  | ✔ |  |  |  |  |  |  |  |
| Free, contact dietitian if you have questions （Online Communication Tools） |  | ✔ | ✔ | ✔ | ✔ | ✔ | ✔ | ✔ | ✔ | ✔ | ✔ | ✔ | ✔ | ✔ |  |  |  |
| **Survey and measurement** | Research Description and Consent Form | | ✔ |  |  |  |  |  |  |  |  |  |  |  |  |  |  |  |  |
| 1 | Anthropometric measurements (Height, weight, body fat percentage) | ✔ |  |  | ✔ |  |  |  | ✔ |  |  |  | ✔ |  | ✔ | ✔ | ✔ | ✔ |
| 2 | Sports Nutrition Knowledge (SNK) | ✔ |  |  |  |  |  |  |  |  |  |  |  |  | ✔ |  |  | ✔ |
| 3 | Treatment self-regulation questionnaire (TSRQ) | ✔ |  |  |  |  |  |  |  |  |  |  |  |  | ✔ | ✔ | ✔ | ✔ |
| 4 | Brief-type self-administered diet history questionnaire (BDHQ) | ✔ |  |  |  |  |  |  |  |  |  |  |  |  | ✔ |  |  | ✔ |

SDT group: Self-Determination Theory group COT group: Control group

**Table S2.** Between-group differences in anthropometric measurements, SNK and TSRQ (prior)

|  |  | [Self-Determination Theory group（](\\\\IHADTCSV\\Redirect$\\Teacher\\seino-ju\\Documents\\清野\\〓Table+1.2.3.4.5-2江夏1017修正.xlsx" \l "'Table 2 '!A2)*[n](\\\\IHADTCSV\\Redirect$\\Teacher\\seino-ju\\Documents\\清野\\〓Table+1.2.3.4.5-2江夏1017修正.xlsx" \l "'Table 2 '!A2)* [= 14）](\\\\IHADTCSV\\Redirect$\\Teacher\\seino-ju\\Documents\\清野\\〓Table+1.2.3.4.5-2江夏1017修正.xlsx" \l "'Table 2 '!A2) | | | | | | | | | | |  | [Control group（](\\\\IHADTCSV\\Redirect$\\Teacher\\seino-ju\\Documents\\清野\\〓Table+1.2.3.4.5-2江夏1017修正.xlsx" \l "'Table 2 '!A2)*[n](\\\\IHADTCSV\\Redirect$\\Teacher\\seino-ju\\Documents\\清野\\〓Table+1.2.3.4.5-2江夏1017修正.xlsx" \l "'Table 2 '!A2)* [= 17）](\\\\IHADTCSV\\Redirect$\\Teacher\\seino-ju\\Documents\\清野\\〓Table+1.2.3.4.5-2江夏1017修正.xlsx" \l "'Table 2 '!A2) | | | | | | | | | | |  | *[p](\\\\IHADTCSV\\Redirect$\\Teacher\\seino-ju\\Documents\\清野\\〓Table+1.2.3.4.5-2江夏1017修正.xlsx" \l "'Table 2 '!A2)* [value](\\\\IHADTCSV\\Redirect$\\Teacher\\seino-ju\\Documents\\清野\\〓Table+1.2.3.4.5-2江夏1017修正.xlsx" \l "'Table 2 '!A2)[†](\\\\IHADTCSV\\Redirect$\\Teacher\\seino-ju\\Documents\\清野\\〓Table+1.2.3.4.5-2江夏1017修正.xlsx" \l "'Table 2 '!A2) | |
| --- | --- | --- | --- | --- | --- | --- | --- | --- | --- | --- | --- | --- | --- | --- | --- | --- | --- | --- | --- | --- | --- | --- | --- | --- | --- | --- | --- |
|  |  | [Before](\\\\IHADTCSV\\Redirect$\\Teacher\\seino-ju\\Documents\\清野\\〓Table+1.2.3.4.5-2江夏1017修正.xlsx" \l "'Table 2 '!A2) | | |  | [Immediately after](\\\\IHADTCSV\\Redirect$\\Teacher\\seino-ju\\Documents\\清野\\〓Table+1.2.3.4.5-2江夏1017修正.xlsx" \l "'Table 2 '!A2) | | |  | [After three months](\\\\IHADTCSV\\Redirect$\\Teacher\\seino-ju\\Documents\\清野\\〓Table+1.2.3.4.5-2江夏1017修正.xlsx" \l "'Table 2 '!A2) | | |  | [Before](\\\\IHADTCSV\\Redirect$\\Teacher\\seino-ju\\Documents\\清野\\〓Table+1.2.3.4.5-2江夏1017修正.xlsx" \l "'Table 2 '!A2) | | |  | [Immediately after](\\\\IHADTCSV\\Redirect$\\Teacher\\seino-ju\\Documents\\清野\\〓Table+1.2.3.4.5-2江夏1017修正.xlsx" \l "'Table 2 '!A2) | | |  | [After three months](\\\\IHADTCSV\\Redirect$\\Teacher\\seino-ju\\Documents\\清野\\〓Table+1.2.3.4.5-2江夏1017修正.xlsx" \l "'Table 2 '!A2) | | |  |
|  |  | [mean value±SD](\\\\IHADTCSV\\Redirect$\\Teacher\\seino-ju\\Documents\\清野\\〓Table+1.2.3.4.5-2江夏1017修正.xlsx" \l "'Table 2 '!A2) | | |  | [mean value±SD](\\\\IHADTCSV\\Redirect$\\Teacher\\seino-ju\\Documents\\清野\\〓Table+1.2.3.4.5-2江夏1017修正.xlsx" \l "'Table 2 '!A2) | | |  | [mean value±SD](\\\\IHADTCSV\\Redirect$\\Teacher\\seino-ju\\Documents\\清野\\〓Table+1.2.3.4.5-2江夏1017修正.xlsx" \l "'Table 2 '!A2) | | |  | [mean value±SD](\\\\IHADTCSV\\Redirect$\\Teacher\\seino-ju\\Documents\\清野\\〓Table+1.2.3.4.5-2江夏1017修正.xlsx" \l "'Table 2 '!A2) | | |  | [mean value±SD](\\\\IHADTCSV\\Redirect$\\Teacher\\seino-ju\\Documents\\清野\\〓Table+1.2.3.4.5-2江夏1017修正.xlsx" \l "'Table 2 '!A2) | | |  | [mean value±SD](\\\\IHADTCSV\\Redirect$\\Teacher\\seino-ju\\Documents\\清野\\〓Table+1.2.3.4.5-2江夏1017修正.xlsx" \l "'Table 2 '!A2) | | |  |
| **[Anthropometric measurements](\\\\IHADTCSV\\Redirect$\\Teacher\\seino-ju\\Documents\\清野\\〓Table+1.2.3.4.5-2江夏1017修正.xlsx" \l "'Table 2 '!A2)** | |  |  |  |  |  |  |  |  |  |  |  |  |  |  |  |  |  |  |  |  |  |  |  |  |  |  |
|  | [Age (yrs)](\\\\IHADTCSV\\Redirect$\\Teacher\\seino-ju\\Documents\\清野\\〓Table+1.2.3.4.5-2江夏1017修正.xlsx" \l "'Table 2 '!A2) | [19.6](\\\\IHADTCSV\\Redirect$\\Teacher\\seino-ju\\Documents\\清野\\〓Table+1.2.3.4.5-2江夏1017修正.xlsx" \l "'Table 2 '!A2) | [±](\\\\IHADTCSV\\Redirect$\\Teacher\\seino-ju\\Documents\\清野\\〓Table+1.2.3.4.5-2江夏1017修正.xlsx" \l "'Table 2 '!A2) | [1.5](\\\\IHADTCSV\\Redirect$\\Teacher\\seino-ju\\Documents\\清野\\〓Table+1.2.3.4.5-2江夏1017修正.xlsx" \l "'Table 2 '!A2) |  | [19.9](\\\\IHADTCSV\\Redirect$\\Teacher\\seino-ju\\Documents\\清野\\〓Table+1.2.3.4.5-2江夏1017修正.xlsx" \l "'Table 2 '!A2) | [±](\\\\IHADTCSV\\Redirect$\\Teacher\\seino-ju\\Documents\\清野\\〓Table+1.2.3.4.5-2江夏1017修正.xlsx" \l "'Table 2 '!A2) | [1.6](\\\\IHADTCSV\\Redirect$\\Teacher\\seino-ju\\Documents\\清野\\〓Table+1.2.3.4.5-2江夏1017修正.xlsx" \l "'Table 2 '!A2) |  | [19.9](\\\\IHADTCSV\\Redirect$\\Teacher\\seino-ju\\Documents\\清野\\〓Table+1.2.3.4.5-2江夏1017修正.xlsx" \l "'Table 2 '!A2) | [±](\\\\IHADTCSV\\Redirect$\\Teacher\\seino-ju\\Documents\\清野\\〓Table+1.2.3.4.5-2江夏1017修正.xlsx" \l "'Table 2 '!A2) | [1.6](\\\\IHADTCSV\\Redirect$\\Teacher\\seino-ju\\Documents\\清野\\〓Table+1.2.3.4.5-2江夏1017修正.xlsx" \l "'Table 2 '!A2) |  | [19.6](\\\\IHADTCSV\\Redirect$\\Teacher\\seino-ju\\Documents\\清野\\〓Table+1.2.3.4.5-2江夏1017修正.xlsx" \l "'Table 2 '!A2) | [±](\\\\IHADTCSV\\Redirect$\\Teacher\\seino-ju\\Documents\\清野\\〓Table+1.2.3.4.5-2江夏1017修正.xlsx" \l "'Table 2 '!A2) | [1.3](\\\\IHADTCSV\\Redirect$\\Teacher\\seino-ju\\Documents\\清野\\〓Table+1.2.3.4.5-2江夏1017修正.xlsx" \l "'Table 2 '!A2) |  | [19.9](\\\\IHADTCSV\\Redirect$\\Teacher\\seino-ju\\Documents\\清野\\〓Table+1.2.3.4.5-2江夏1017修正.xlsx" \l "'Table 2 '!A2) | [±](\\\\IHADTCSV\\Redirect$\\Teacher\\seino-ju\\Documents\\清野\\〓Table+1.2.3.4.5-2江夏1017修正.xlsx" \l "'Table 2 '!A2) | [1.5](\\\\IHADTCSV\\Redirect$\\Teacher\\seino-ju\\Documents\\清野\\〓Table+1.2.3.4.5-2江夏1017修正.xlsx" \l "'Table 2 '!A2) |  | [19.9](\\\\IHADTCSV\\Redirect$\\Teacher\\seino-ju\\Documents\\清野\\〓Table+1.2.3.4.5-2江夏1017修正.xlsx" \l "'Table 2 '!A2) | [±](\\\\IHADTCSV\\Redirect$\\Teacher\\seino-ju\\Documents\\清野\\〓Table+1.2.3.4.5-2江夏1017修正.xlsx" \l "'Table 2 '!A2) | [1.5](\\\\IHADTCSV\\Redirect$\\Teacher\\seino-ju\\Documents\\清野\\〓Table+1.2.3.4.5-2江夏1017修正.xlsx" \l "'Table 2 '!A2) |  |  | [0.973](\\\\IHADTCSV\\Redirect$\\Teacher\\seino-ju\\Documents\\清野\\〓Table+1.2.3.4.5-2江夏1017修正.xlsx" \l "'Table 2 '!A2) |
|  | [Height (cm)](\\\\IHADTCSV\\Redirect$\\Teacher\\seino-ju\\Documents\\清野\\〓Table+1.2.3.4.5-2江夏1017修正.xlsx" \l "'Table 2 '!A2) | [173.9](\\\\IHADTCSV\\Redirect$\\Teacher\\seino-ju\\Documents\\清野\\〓Table+1.2.3.4.5-2江夏1017修正.xlsx" \l "'Table 2 '!A2) | [±](\\\\IHADTCSV\\Redirect$\\Teacher\\seino-ju\\Documents\\清野\\〓Table+1.2.3.4.5-2江夏1017修正.xlsx" \l "'Table 2 '!A2) | [4.8](\\\\IHADTCSV\\Redirect$\\Teacher\\seino-ju\\Documents\\清野\\〓Table+1.2.3.4.5-2江夏1017修正.xlsx" \l "'Table 2 '!A2) |  | [173.9](\\\\IHADTCSV\\Redirect$\\Teacher\\seino-ju\\Documents\\清野\\〓Table+1.2.3.4.5-2江夏1017修正.xlsx" \l "'Table 2 '!A2) | [±](\\\\IHADTCSV\\Redirect$\\Teacher\\seino-ju\\Documents\\清野\\〓Table+1.2.3.4.5-2江夏1017修正.xlsx" \l "'Table 2 '!A2) | [4.8](\\\\IHADTCSV\\Redirect$\\Teacher\\seino-ju\\Documents\\清野\\〓Table+1.2.3.4.5-2江夏1017修正.xlsx" \l "'Table 2 '!A2) |  | [173.9](\\\\IHADTCSV\\Redirect$\\Teacher\\seino-ju\\Documents\\清野\\〓Table+1.2.3.4.5-2江夏1017修正.xlsx" \l "'Table 2 '!A2) | [±](\\\\IHADTCSV\\Redirect$\\Teacher\\seino-ju\\Documents\\清野\\〓Table+1.2.3.4.5-2江夏1017修正.xlsx" \l "'Table 2 '!A2) | [4.9](\\\\IHADTCSV\\Redirect$\\Teacher\\seino-ju\\Documents\\清野\\〓Table+1.2.3.4.5-2江夏1017修正.xlsx" \l "'Table 2 '!A2) |  | [173.1](\\\\IHADTCSV\\Redirect$\\Teacher\\seino-ju\\Documents\\清野\\〓Table+1.2.3.4.5-2江夏1017修正.xlsx" \l "'Table 2 '!A2) | [±](\\\\IHADTCSV\\Redirect$\\Teacher\\seino-ju\\Documents\\清野\\〓Table+1.2.3.4.5-2江夏1017修正.xlsx" \l "'Table 2 '!A2) | [5.6](\\\\IHADTCSV\\Redirect$\\Teacher\\seino-ju\\Documents\\清野\\〓Table+1.2.3.4.5-2江夏1017修正.xlsx" \l "'Table 2 '!A2) |  | [172.9](\\\\IHADTCSV\\Redirect$\\Teacher\\seino-ju\\Documents\\清野\\〓Table+1.2.3.4.5-2江夏1017修正.xlsx" \l "'Table 2 '!A2) | [±](\\\\IHADTCSV\\Redirect$\\Teacher\\seino-ju\\Documents\\清野\\〓Table+1.2.3.4.5-2江夏1017修正.xlsx" \l "'Table 2 '!A2) | [5.5](\\\\IHADTCSV\\Redirect$\\Teacher\\seino-ju\\Documents\\清野\\〓Table+1.2.3.4.5-2江夏1017修正.xlsx" \l "'Table 2 '!A2) |  | [172.8](\\\\IHADTCSV\\Redirect$\\Teacher\\seino-ju\\Documents\\清野\\〓Table+1.2.3.4.5-2江夏1017修正.xlsx" \l "'Table 2 '!A2) | [±](\\\\IHADTCSV\\Redirect$\\Teacher\\seino-ju\\Documents\\清野\\〓Table+1.2.3.4.5-2江夏1017修正.xlsx" \l "'Table 2 '!A2) | [5.7](\\\\IHADTCSV\\Redirect$\\Teacher\\seino-ju\\Documents\\清野\\〓Table+1.2.3.4.5-2江夏1017修正.xlsx" \l "'Table 2 '!A2) |  |  | [0.682](\\\\IHADTCSV\\Redirect$\\Teacher\\seino-ju\\Documents\\清野\\〓Table+1.2.3.4.5-2江夏1017修正.xlsx" \l "'Table 2 '!A2) |
| [Weight (kg)](\\\\IHADTCSV\\Redirect$\\Teacher\\seino-ju\\Documents\\清野\\〓Table+1.2.3.4.5-2江夏1017修正.xlsx" \l "'Table 2 '!A2) | [72.0](\\\\IHADTCSV\\Redirect$\\Teacher\\seino-ju\\Documents\\清野\\〓Table+1.2.3.4.5-2江夏1017修正.xlsx" \l "'Table 2 '!A2) | [±](\\\\IHADTCSV\\Redirect$\\Teacher\\seino-ju\\Documents\\清野\\〓Table+1.2.3.4.5-2江夏1017修正.xlsx" \l "'Table 2 '!A2) | [7.9](\\\\IHADTCSV\\Redirect$\\Teacher\\seino-ju\\Documents\\清野\\〓Table+1.2.3.4.5-2江夏1017修正.xlsx" \l "'Table 2 '!A2) |  | [71.5](\\\\IHADTCSV\\Redirect$\\Teacher\\seino-ju\\Documents\\清野\\〓Table+1.2.3.4.5-2江夏1017修正.xlsx" \l "'Table 2 '!A2) | [±](\\\\IHADTCSV\\Redirect$\\Teacher\\seino-ju\\Documents\\清野\\〓Table+1.2.3.4.5-2江夏1017修正.xlsx" \l "'Table 2 '!A2) | [6.2](\\\\IHADTCSV\\Redirect$\\Teacher\\seino-ju\\Documents\\清野\\〓Table+1.2.3.4.5-2江夏1017修正.xlsx" \l "'Table 2 '!A2) |  | [72.4](\\\\IHADTCSV\\Redirect$\\Teacher\\seino-ju\\Documents\\清野\\〓Table+1.2.3.4.5-2江夏1017修正.xlsx" \l "'Table 2 '!A2) | [±](\\\\IHADTCSV\\Redirect$\\Teacher\\seino-ju\\Documents\\清野\\〓Table+1.2.3.4.5-2江夏1017修正.xlsx" \l "'Table 2 '!A2) | [6.0](\\\\IHADTCSV\\Redirect$\\Teacher\\seino-ju\\Documents\\清野\\〓Table+1.2.3.4.5-2江夏1017修正.xlsx" \l "'Table 2 '!A2) |  | [68.3](\\\\IHADTCSV\\Redirect$\\Teacher\\seino-ju\\Documents\\清野\\〓Table+1.2.3.4.5-2江夏1017修正.xlsx" \l "'Table 2 '!A2) | [±](\\\\IHADTCSV\\Redirect$\\Teacher\\seino-ju\\Documents\\清野\\〓Table+1.2.3.4.5-2江夏1017修正.xlsx" \l "'Table 2 '!A2) | [6.2](\\\\IHADTCSV\\Redirect$\\Teacher\\seino-ju\\Documents\\清野\\〓Table+1.2.3.4.5-2江夏1017修正.xlsx" \l "'Table 2 '!A2) |  | [69.2](\\\\IHADTCSV\\Redirect$\\Teacher\\seino-ju\\Documents\\清野\\〓Table+1.2.3.4.5-2江夏1017修正.xlsx" \l "'Table 2 '!A2) | [±](\\\\IHADTCSV\\Redirect$\\Teacher\\seino-ju\\Documents\\清野\\〓Table+1.2.3.4.5-2江夏1017修正.xlsx" \l "'Table 2 '!A2) | [6.3](\\\\IHADTCSV\\Redirect$\\Teacher\\seino-ju\\Documents\\清野\\〓Table+1.2.3.4.5-2江夏1017修正.xlsx" \l "'Table 2 '!A2) |  | [69.6](\\\\IHADTCSV\\Redirect$\\Teacher\\seino-ju\\Documents\\清野\\〓Table+1.2.3.4.5-2江夏1017修正.xlsx" \l "'Table 2 '!A2) | [±](\\\\IHADTCSV\\Redirect$\\Teacher\\seino-ju\\Documents\\清野\\〓Table+1.2.3.4.5-2江夏1017修正.xlsx" \l "'Table 2 '!A2) | [5.4](\\\\IHADTCSV\\Redirect$\\Teacher\\seino-ju\\Documents\\清野\\〓Table+1.2.3.4.5-2江夏1017修正.xlsx" \l "'Table 2 '!A2) |  |  | [0.152](\\\\IHADTCSV\\Redirect$\\Teacher\\seino-ju\\Documents\\清野\\〓Table+1.2.3.4.5-2江夏1017修正.xlsx" \l "'Table 2 '!A2) |
| [Body fat (%)](\\\\IHADTCSV\\Redirect$\\Teacher\\seino-ju\\Documents\\清野\\〓Table+1.2.3.4.5-2江夏1017修正.xlsx" \l "'Table 2 '!A2) | [14.6](\\\\IHADTCSV\\Redirect$\\Teacher\\seino-ju\\Documents\\清野\\〓Table+1.2.3.4.5-2江夏1017修正.xlsx" \l "'Table 2 '!A2) | [±](\\\\IHADTCSV\\Redirect$\\Teacher\\seino-ju\\Documents\\清野\\〓Table+1.2.3.4.5-2江夏1017修正.xlsx" \l "'Table 2 '!A2) | [4.1](\\\\IHADTCSV\\Redirect$\\Teacher\\seino-ju\\Documents\\清野\\〓Table+1.2.3.4.5-2江夏1017修正.xlsx" \l "'Table 2 '!A2) |  | [14.3](\\\\IHADTCSV\\Redirect$\\Teacher\\seino-ju\\Documents\\清野\\〓Table+1.2.3.4.5-2江夏1017修正.xlsx" \l "'Table 2 '!A2) | [±](\\\\IHADTCSV\\Redirect$\\Teacher\\seino-ju\\Documents\\清野\\〓Table+1.2.3.4.5-2江夏1017修正.xlsx" \l "'Table 2 '!A2) | [3.9](\\\\IHADTCSV\\Redirect$\\Teacher\\seino-ju\\Documents\\清野\\〓Table+1.2.3.4.5-2江夏1017修正.xlsx" \l "'Table 2 '!A2) |  | [14.4](\\\\IHADTCSV\\Redirect$\\Teacher\\seino-ju\\Documents\\清野\\〓Table+1.2.3.4.5-2江夏1017修正.xlsx" \l "'Table 2 '!A2) | [±](\\\\IHADTCSV\\Redirect$\\Teacher\\seino-ju\\Documents\\清野\\〓Table+1.2.3.4.5-2江夏1017修正.xlsx" \l "'Table 2 '!A2) | [3.0](\\\\IHADTCSV\\Redirect$\\Teacher\\seino-ju\\Documents\\清野\\〓Table+1.2.3.4.5-2江夏1017修正.xlsx" \l "'Table 2 '!A2) |  | [14.0](\\\\IHADTCSV\\Redirect$\\Teacher\\seino-ju\\Documents\\清野\\〓Table+1.2.3.4.5-2江夏1017修正.xlsx" \l "'Table 2 '!A2) | [±](\\\\IHADTCSV\\Redirect$\\Teacher\\seino-ju\\Documents\\清野\\〓Table+1.2.3.4.5-2江夏1017修正.xlsx" \l "'Table 2 '!A2) | [4.3](\\\\IHADTCSV\\Redirect$\\Teacher\\seino-ju\\Documents\\清野\\〓Table+1.2.3.4.5-2江夏1017修正.xlsx" \l "'Table 2 '!A2) |  | [12.7](\\\\IHADTCSV\\Redirect$\\Teacher\\seino-ju\\Documents\\清野\\〓Table+1.2.3.4.5-2江夏1017修正.xlsx" \l "'Table 2 '!A2) | [±](\\\\IHADTCSV\\Redirect$\\Teacher\\seino-ju\\Documents\\清野\\〓Table+1.2.3.4.5-2江夏1017修正.xlsx" \l "'Table 2 '!A2) | [3.9](\\\\IHADTCSV\\Redirect$\\Teacher\\seino-ju\\Documents\\清野\\〓Table+1.2.3.4.5-2江夏1017修正.xlsx" \l "'Table 2 '!A2) |  | [13.3](\\\\IHADTCSV\\Redirect$\\Teacher\\seino-ju\\Documents\\清野\\〓Table+1.2.3.4.5-2江夏1017修正.xlsx" \l "'Table 2 '!A2) | [±](\\\\IHADTCSV\\Redirect$\\Teacher\\seino-ju\\Documents\\清野\\〓Table+1.2.3.4.5-2江夏1017修正.xlsx" \l "'Table 2 '!A2) | [3.4](\\\\IHADTCSV\\Redirect$\\Teacher\\seino-ju\\Documents\\清野\\〓Table+1.2.3.4.5-2江夏1017修正.xlsx" \l "'Table 2 '!A2) |  |  | [0.712](\\\\IHADTCSV\\Redirect$\\Teacher\\seino-ju\\Documents\\清野\\〓Table+1.2.3.4.5-2江夏1017修正.xlsx" \l "'Table 2 '!A2) |
| [Lean body mass (kg)](\\\\IHADTCSV\\Redirect$\\Teacher\\seino-ju\\Documents\\清野\\〓Table+1.2.3.4.5-2江夏1017修正.xlsx" \l "'Table 2 '!A2) | [61.4](\\\\IHADTCSV\\Redirect$\\Teacher\\seino-ju\\Documents\\清野\\〓Table+1.2.3.4.5-2江夏1017修正.xlsx" \l "'Table 2 '!A2) | [±](\\\\IHADTCSV\\Redirect$\\Teacher\\seino-ju\\Documents\\清野\\〓Table+1.2.3.4.5-2江夏1017修正.xlsx" \l "'Table 2 '!A2) | [5.7](\\\\IHADTCSV\\Redirect$\\Teacher\\seino-ju\\Documents\\清野\\〓Table+1.2.3.4.5-2江夏1017修正.xlsx" \l "'Table 2 '!A2) |  | [61.2](\\\\IHADTCSV\\Redirect$\\Teacher\\seino-ju\\Documents\\清野\\〓Table+1.2.3.4.5-2江夏1017修正.xlsx" \l "'Table 2 '!A2) | [±](\\\\IHADTCSV\\Redirect$\\Teacher\\seino-ju\\Documents\\清野\\〓Table+1.2.3.4.5-2江夏1017修正.xlsx" \l "'Table 2 '!A2) | [5.6](\\\\IHADTCSV\\Redirect$\\Teacher\\seino-ju\\Documents\\清野\\〓Table+1.2.3.4.5-2江夏1017修正.xlsx" \l "'Table 2 '!A2) |  | [62.0](\\\\IHADTCSV\\Redirect$\\Teacher\\seino-ju\\Documents\\清野\\〓Table+1.2.3.4.5-2江夏1017修正.xlsx" \l "'Table 2 '!A2) | [±](\\\\IHADTCSV\\Redirect$\\Teacher\\seino-ju\\Documents\\清野\\〓Table+1.2.3.4.5-2江夏1017修正.xlsx" \l "'Table 2 '!A2) | [5.6](\\\\IHADTCSV\\Redirect$\\Teacher\\seino-ju\\Documents\\清野\\〓Table+1.2.3.4.5-2江夏1017修正.xlsx" \l "'Table 2 '!A2) |  | [58.8](\\\\IHADTCSV\\Redirect$\\Teacher\\seino-ju\\Documents\\清野\\〓Table+1.2.3.4.5-2江夏1017修正.xlsx" \l "'Table 2 '!A2) | [±](\\\\IHADTCSV\\Redirect$\\Teacher\\seino-ju\\Documents\\清野\\〓Table+1.2.3.4.5-2江夏1017修正.xlsx" \l "'Table 2 '!A2) | [7.1](\\\\IHADTCSV\\Redirect$\\Teacher\\seino-ju\\Documents\\清野\\〓Table+1.2.3.4.5-2江夏1017修正.xlsx" \l "'Table 2 '!A2) |  | [60.4](\\\\IHADTCSV\\Redirect$\\Teacher\\seino-ju\\Documents\\清野\\〓Table+1.2.3.4.5-2江夏1017修正.xlsx" \l "'Table 2 '!A2) | [±](\\\\IHADTCSV\\Redirect$\\Teacher\\seino-ju\\Documents\\清野\\〓Table+1.2.3.4.5-2江夏1017修正.xlsx" \l "'Table 2 '!A2) | [5.8](\\\\IHADTCSV\\Redirect$\\Teacher\\seino-ju\\Documents\\清野\\〓Table+1.2.3.4.5-2江夏1017修正.xlsx" \l "'Table 2 '!A2) |  | [60.3](\\\\IHADTCSV\\Redirect$\\Teacher\\seino-ju\\Documents\\清野\\〓Table+1.2.3.4.5-2江夏1017修正.xlsx" \l "'Table 2 '!A2) | [±](\\\\IHADTCSV\\Redirect$\\Teacher\\seino-ju\\Documents\\清野\\〓Table+1.2.3.4.5-2江夏1017修正.xlsx" \l "'Table 2 '!A2) | [4.8](\\\\IHADTCSV\\Redirect$\\Teacher\\seino-ju\\Documents\\清野\\〓Table+1.2.3.4.5-2江夏1017修正.xlsx" \l "'Table 2 '!A2) |  |  | [0.290](\\\\IHADTCSV\\Redirect$\\Teacher\\seino-ju\\Documents\\清野\\〓Table+1.2.3.4.5-2江夏1017修正.xlsx" \l "'Table 2 '!A2) |
| [Lean body mass/m (kg)](\\\\IHADTCSV\\Redirect$\\Teacher\\seino-ju\\Documents\\清野\\〓Table+1.2.3.4.5-2江夏1017修正.xlsx" \l "'Table 2 '!A2) | [35.3](\\\\IHADTCSV\\Redirect$\\Teacher\\seino-ju\\Documents\\清野\\〓Table+1.2.3.4.5-2江夏1017修正.xlsx" \l "'Table 2 '!A2) | [±](\\\\IHADTCSV\\Redirect$\\Teacher\\seino-ju\\Documents\\清野\\〓Table+1.2.3.4.5-2江夏1017修正.xlsx" \l "'Table 2 '!A2) | [2.8](\\\\IHADTCSV\\Redirect$\\Teacher\\seino-ju\\Documents\\清野\\〓Table+1.2.3.4.5-2江夏1017修正.xlsx" \l "'Table 2 '!A2) |  | [35.2](\\\\IHADTCSV\\Redirect$\\Teacher\\seino-ju\\Documents\\清野\\〓Table+1.2.3.4.5-2江夏1017修正.xlsx" \l "'Table 2 '!A2) | [±](\\\\IHADTCSV\\Redirect$\\Teacher\\seino-ju\\Documents\\清野\\〓Table+1.2.3.4.5-2江夏1017修正.xlsx" \l "'Table 2 '!A2) | [2.7](\\\\IHADTCSV\\Redirect$\\Teacher\\seino-ju\\Documents\\清野\\〓Table+1.2.3.4.5-2江夏1017修正.xlsx" \l "'Table 2 '!A2) |  | [35.6](\\\\IHADTCSV\\Redirect$\\Teacher\\seino-ju\\Documents\\清野\\〓Table+1.2.3.4.5-2江夏1017修正.xlsx" \l "'Table 2 '!A2) | [±](\\\\IHADTCSV\\Redirect$\\Teacher\\seino-ju\\Documents\\清野\\〓Table+1.2.3.4.5-2江夏1017修正.xlsx" \l "'Table 2 '!A2) | [2.5](\\\\IHADTCSV\\Redirect$\\Teacher\\seino-ju\\Documents\\清野\\〓Table+1.2.3.4.5-2江夏1017修正.xlsx" \l "'Table 2 '!A2) |  | [33.9](\\\\IHADTCSV\\Redirect$\\Teacher\\seino-ju\\Documents\\清野\\〓Table+1.2.3.4.5-2江夏1017修正.xlsx" \l "'Table 2 '!A2) | [±](\\\\IHADTCSV\\Redirect$\\Teacher\\seino-ju\\Documents\\清野\\〓Table+1.2.3.4.5-2江夏1017修正.xlsx" \l "'Table 2 '!A2) | [3.4](\\\\IHADTCSV\\Redirect$\\Teacher\\seino-ju\\Documents\\清野\\〓Table+1.2.3.4.5-2江夏1017修正.xlsx" \l "'Table 2 '!A2) |  | [34.9](\\\\IHADTCSV\\Redirect$\\Teacher\\seino-ju\\Documents\\清野\\〓Table+1.2.3.4.5-2江夏1017修正.xlsx" \l "'Table 2 '!A2) | [±](\\\\IHADTCSV\\Redirect$\\Teacher\\seino-ju\\Documents\\清野\\〓Table+1.2.3.4.5-2江夏1017修正.xlsx" \l "'Table 2 '!A2) | [2.5](\\\\IHADTCSV\\Redirect$\\Teacher\\seino-ju\\Documents\\清野\\〓Table+1.2.3.4.5-2江夏1017修正.xlsx" \l "'Table 2 '!A2) |  | [34.8](\\\\IHADTCSV\\Redirect$\\Teacher\\seino-ju\\Documents\\清野\\〓Table+1.2.3.4.5-2江夏1017修正.xlsx" \l "'Table 2 '!A2) | [±](\\\\IHADTCSV\\Redirect$\\Teacher\\seino-ju\\Documents\\清野\\〓Table+1.2.3.4.5-2江夏1017修正.xlsx" \l "'Table 2 '!A2) | [2.0](\\\\IHADTCSV\\Redirect$\\Teacher\\seino-ju\\Documents\\清野\\〓Table+1.2.3.4.5-2江夏1017修正.xlsx" \l "'Table 2 '!A2) |  |  | [0.251](\\\\IHADTCSV\\Redirect$\\Teacher\\seino-ju\\Documents\\清野\\〓Table+1.2.3.4.5-2江夏1017修正.xlsx" \l "'Table 2 '!A2) |
| **[SNK](\\\\IHADTCSV\\Redirect$\\Teacher\\seino-ju\\Documents\\清野\\〓Table+1.2.3.4.5-2江夏1017修正.xlsx" \l "'Table 2 '!A2)** | |  |  |  |  |  |  |  |  |  |  |  |  |  |  |  |  |  |  |  |  |  |  |  |  |  |  |
|  | [Total SNK score (%)](\\\\IHADTCSV\\Redirect$\\Teacher\\seino-ju\\Documents\\清野\\〓Table+1.2.3.4.5-2江夏1017修正.xlsx" \l "'Table 2 '!A2) | [78.6](\\\\IHADTCSV\\Redirect$\\Teacher\\seino-ju\\Documents\\清野\\〓Table+1.2.3.4.5-2江夏1017修正.xlsx" \l "'Table 2 '!A2) | [±](\\\\IHADTCSV\\Redirect$\\Teacher\\seino-ju\\Documents\\清野\\〓Table+1.2.3.4.5-2江夏1017修正.xlsx" \l "'Table 2 '!A2) | [12.5](\\\\IHADTCSV\\Redirect$\\Teacher\\seino-ju\\Documents\\清野\\〓Table+1.2.3.4.5-2江夏1017修正.xlsx" \l "'Table 2 '!A2) |  | [87.2](\\\\IHADTCSV\\Redirect$\\Teacher\\seino-ju\\Documents\\清野\\〓Table+1.2.3.4.5-2江夏1017修正.xlsx" \l "'Table 2 '!A2) | [±](\\\\IHADTCSV\\Redirect$\\Teacher\\seino-ju\\Documents\\清野\\〓Table+1.2.3.4.5-2江夏1017修正.xlsx" \l "'Table 2 '!A2) | [7.5](\\\\IHADTCSV\\Redirect$\\Teacher\\seino-ju\\Documents\\清野\\〓Table+1.2.3.4.5-2江夏1017修正.xlsx" \l "'Table 2 '!A2) |  | [87.2](\\\\IHADTCSV\\Redirect$\\Teacher\\seino-ju\\Documents\\清野\\〓Table+1.2.3.4.5-2江夏1017修正.xlsx" \l "'Table 2 '!A2) | [±](\\\\IHADTCSV\\Redirect$\\Teacher\\seino-ju\\Documents\\清野\\〓Table+1.2.3.4.5-2江夏1017修正.xlsx" \l "'Table 2 '!A2) | [8.0](\\\\IHADTCSV\\Redirect$\\Teacher\\seino-ju\\Documents\\清野\\〓Table+1.2.3.4.5-2江夏1017修正.xlsx" \l "'Table 2 '!A2) |  | [75.6](\\\\IHADTCSV\\Redirect$\\Teacher\\seino-ju\\Documents\\清野\\〓Table+1.2.3.4.5-2江夏1017修正.xlsx" \l "'Table 2 '!A2) | [±](\\\\IHADTCSV\\Redirect$\\Teacher\\seino-ju\\Documents\\清野\\〓Table+1.2.3.4.5-2江夏1017修正.xlsx" \l "'Table 2 '!A2) | [10.1](\\\\IHADTCSV\\Redirect$\\Teacher\\seino-ju\\Documents\\清野\\〓Table+1.2.3.4.5-2江夏1017修正.xlsx" \l "'Table 2 '!A2) |  | [83.6](\\\\IHADTCSV\\Redirect$\\Teacher\\seino-ju\\Documents\\清野\\〓Table+1.2.3.4.5-2江夏1017修正.xlsx" \l "'Table 2 '!A2) | [±](\\\\IHADTCSV\\Redirect$\\Teacher\\seino-ju\\Documents\\清野\\〓Table+1.2.3.4.5-2江夏1017修正.xlsx" \l "'Table 2 '!A2) | [8.3](\\\\IHADTCSV\\Redirect$\\Teacher\\seino-ju\\Documents\\清野\\〓Table+1.2.3.4.5-2江夏1017修正.xlsx" \l "'Table 2 '!A2) |  | [79.0](\\\\IHADTCSV\\Redirect$\\Teacher\\seino-ju\\Documents\\清野\\〓Table+1.2.3.4.5-2江夏1017修正.xlsx" \l "'Table 2 '!A2) | [±](\\\\IHADTCSV\\Redirect$\\Teacher\\seino-ju\\Documents\\清野\\〓Table+1.2.3.4.5-2江夏1017修正.xlsx" \l "'Table 2 '!A2) | [15.9](\\\\IHADTCSV\\Redirect$\\Teacher\\seino-ju\\Documents\\清野\\〓Table+1.2.3.4.5-2江夏1017修正.xlsx" \l "'Table 2 '!A2) |  |  | [0.475](\\\\IHADTCSV\\Redirect$\\Teacher\\seino-ju\\Documents\\清野\\〓Table+1.2.3.4.5-2江夏1017修正.xlsx" \l "'Table 2 '!A2) |
| [Energy and refueling (%)](\\\\IHADTCSV\\Redirect$\\Teacher\\seino-ju\\Documents\\清野\\〓Table+1.2.3.4.5-2江夏1017修正.xlsx" \l "'Table 2 '!A2) | [84.5](\\\\IHADTCSV\\Redirect$\\Teacher\\seino-ju\\Documents\\清野\\〓Table+1.2.3.4.5-2江夏1017修正.xlsx" \l "'Table 2 '!A2) | [±](\\\\IHADTCSV\\Redirect$\\Teacher\\seino-ju\\Documents\\清野\\〓Table+1.2.3.4.5-2江夏1017修正.xlsx" \l "'Table 2 '!A2) | [12.2](\\\\IHADTCSV\\Redirect$\\Teacher\\seino-ju\\Documents\\清野\\〓Table+1.2.3.4.5-2江夏1017修正.xlsx" \l "'Table 2 '!A2) |  | [90.5](\\\\IHADTCSV\\Redirect$\\Teacher\\seino-ju\\Documents\\清野\\〓Table+1.2.3.4.5-2江夏1017修正.xlsx" \l "'Table 2 '!A2) | [±](\\\\IHADTCSV\\Redirect$\\Teacher\\seino-ju\\Documents\\清野\\〓Table+1.2.3.4.5-2江夏1017修正.xlsx" \l "'Table 2 '!A2) | [12.6](\\\\IHADTCSV\\Redirect$\\Teacher\\seino-ju\\Documents\\清野\\〓Table+1.2.3.4.5-2江夏1017修正.xlsx" \l "'Table 2 '!A2) |  | [91.7](\\\\IHADTCSV\\Redirect$\\Teacher\\seino-ju\\Documents\\清野\\〓Table+1.2.3.4.5-2江夏1017修正.xlsx" \l "'Table 2 '!A2) | [±](\\\\IHADTCSV\\Redirect$\\Teacher\\seino-ju\\Documents\\清野\\〓Table+1.2.3.4.5-2江夏1017修正.xlsx" \l "'Table 2 '!A2) | [10.8](\\\\IHADTCSV\\Redirect$\\Teacher\\seino-ju\\Documents\\清野\\〓Table+1.2.3.4.5-2江夏1017修正.xlsx" \l "'Table 2 '!A2) |  | [77.5](\\\\IHADTCSV\\Redirect$\\Teacher\\seino-ju\\Documents\\清野\\〓Table+1.2.3.4.5-2江夏1017修正.xlsx" \l "'Table 2 '!A2) | [±](\\\\IHADTCSV\\Redirect$\\Teacher\\seino-ju\\Documents\\清野\\〓Table+1.2.3.4.5-2江夏1017修正.xlsx" \l "'Table 2 '!A2) | [19.5](\\\\IHADTCSV\\Redirect$\\Teacher\\seino-ju\\Documents\\清野\\〓Table+1.2.3.4.5-2江夏1017修正.xlsx" \l "'Table 2 '!A2) |  | [86.3](\\\\IHADTCSV\\Redirect$\\Teacher\\seino-ju\\Documents\\清野\\〓Table+1.2.3.4.5-2江夏1017修正.xlsx" \l "'Table 2 '!A2) | [±](\\\\IHADTCSV\\Redirect$\\Teacher\\seino-ju\\Documents\\清野\\〓Table+1.2.3.4.5-2江夏1017修正.xlsx" \l "'Table 2 '!A2) | [14.7](\\\\IHADTCSV\\Redirect$\\Teacher\\seino-ju\\Documents\\清野\\〓Table+1.2.3.4.5-2江夏1017修正.xlsx" \l "'Table 2 '!A2) |  | [81.4](\\\\IHADTCSV\\Redirect$\\Teacher\\seino-ju\\Documents\\清野\\〓Table+1.2.3.4.5-2江夏1017修正.xlsx" \l "'Table 2 '!A2) | [±](\\\\IHADTCSV\\Redirect$\\Teacher\\seino-ju\\Documents\\清野\\〓Table+1.2.3.4.5-2江夏1017修正.xlsx" \l "'Table 2 '!A2) | [17.6](\\\\IHADTCSV\\Redirect$\\Teacher\\seino-ju\\Documents\\清野\\〓Table+1.2.3.4.5-2江夏1017修正.xlsx" \l "'Table 2 '!A2) |  |  | [0.228](\\\\IHADTCSV\\Redirect$\\Teacher\\seino-ju\\Documents\\清野\\〓Table+1.2.3.4.5-2江夏1017修正.xlsx" \l "'Table 2 '!A2) |
| [Hydration (%)](\\\\IHADTCSV\\Redirect$\\Teacher\\seino-ju\\Documents\\清野\\〓Table+1.2.3.4.5-2江夏1017修正.xlsx" \l "'Table 2 '!A2) | [100.0](\\\\IHADTCSV\\Redirect$\\Teacher\\seino-ju\\Documents\\清野\\〓Table+1.2.3.4.5-2江夏1017修正.xlsx" \l "'Table 2 '!A2) | [±](\\\\IHADTCSV\\Redirect$\\Teacher\\seino-ju\\Documents\\清野\\〓Table+1.2.3.4.5-2江夏1017修正.xlsx" \l "'Table 2 '!A2) | [0.0](\\\\IHADTCSV\\Redirect$\\Teacher\\seino-ju\\Documents\\清野\\〓Table+1.2.3.4.5-2江夏1017修正.xlsx" \l "'Table 2 '!A2) |  | [100.0](\\\\IHADTCSV\\Redirect$\\Teacher\\seino-ju\\Documents\\清野\\〓Table+1.2.3.4.5-2江夏1017修正.xlsx" \l "'Table 2 '!A2) | [±](\\\\IHADTCSV\\Redirect$\\Teacher\\seino-ju\\Documents\\清野\\〓Table+1.2.3.4.5-2江夏1017修正.xlsx" \l "'Table 2 '!A2) | [0.0](\\\\IHADTCSV\\Redirect$\\Teacher\\seino-ju\\Documents\\清野\\〓Table+1.2.3.4.5-2江夏1017修正.xlsx" \l "'Table 2 '!A2) |  | [100.0](\\\\IHADTCSV\\Redirect$\\Teacher\\seino-ju\\Documents\\清野\\〓Table+1.2.3.4.5-2江夏1017修正.xlsx" \l "'Table 2 '!A2) | [±](\\\\IHADTCSV\\Redirect$\\Teacher\\seino-ju\\Documents\\清野\\〓Table+1.2.3.4.5-2江夏1017修正.xlsx" \l "'Table 2 '!A2) | [0.0](\\\\IHADTCSV\\Redirect$\\Teacher\\seino-ju\\Documents\\清野\\〓Table+1.2.3.4.5-2江夏1017修正.xlsx" \l "'Table 2 '!A2) |  | [100.0](\\\\IHADTCSV\\Redirect$\\Teacher\\seino-ju\\Documents\\清野\\〓Table+1.2.3.4.5-2江夏1017修正.xlsx" \l "'Table 2 '!A2) | [±](\\\\IHADTCSV\\Redirect$\\Teacher\\seino-ju\\Documents\\清野\\〓Table+1.2.3.4.5-2江夏1017修正.xlsx" \l "'Table 2 '!A2) | [0.0](\\\\IHADTCSV\\Redirect$\\Teacher\\seino-ju\\Documents\\清野\\〓Table+1.2.3.4.5-2江夏1017修正.xlsx" \l "'Table 2 '!A2) |  | [100.0](\\\\IHADTCSV\\Redirect$\\Teacher\\seino-ju\\Documents\\清野\\〓Table+1.2.3.4.5-2江夏1017修正.xlsx" \l "'Table 2 '!A2) | [±](\\\\IHADTCSV\\Redirect$\\Teacher\\seino-ju\\Documents\\清野\\〓Table+1.2.3.4.5-2江夏1017修正.xlsx" \l "'Table 2 '!A2) | [0.0](\\\\IHADTCSV\\Redirect$\\Teacher\\seino-ju\\Documents\\清野\\〓Table+1.2.3.4.5-2江夏1017修正.xlsx" \l "'Table 2 '!A2) |  | [94.1](\\\\IHADTCSV\\Redirect$\\Teacher\\seino-ju\\Documents\\清野\\〓Table+1.2.3.4.5-2江夏1017修正.xlsx" \l "'Table 2 '!A2) | [±](\\\\IHADTCSV\\Redirect$\\Teacher\\seino-ju\\Documents\\清野\\〓Table+1.2.3.4.5-2江夏1017修正.xlsx" \l "'Table 2 '!A2) | [16.6](\\\\IHADTCSV\\Redirect$\\Teacher\\seino-ju\\Documents\\清野\\〓Table+1.2.3.4.5-2江夏1017修正.xlsx" \l "'Table 2 '!A2) |  |  | [―](\\\\IHADTCSV\\Redirect$\\Teacher\\seino-ju\\Documents\\清野\\〓Table+1.2.3.4.5-2江夏1017修正.xlsx" \l "'Table 2 '!A2) |
| [Supplements (%)](\\\\IHADTCSV\\Redirect$\\Teacher\\seino-ju\\Documents\\清野\\〓Table+1.2.3.4.5-2江夏1017修正.xlsx" \l "'Table 2 '!A2) | [81.0](\\\\IHADTCSV\\Redirect$\\Teacher\\seino-ju\\Documents\\清野\\〓Table+1.2.3.4.5-2江夏1017修正.xlsx" \l "'Table 2 '!A2) | [±](\\\\IHADTCSV\\Redirect$\\Teacher\\seino-ju\\Documents\\清野\\〓Table+1.2.3.4.5-2江夏1017修正.xlsx" \l "'Table 2 '!A2) | [25.2](\\\\IHADTCSV\\Redirect$\\Teacher\\seino-ju\\Documents\\清野\\〓Table+1.2.3.4.5-2江夏1017修正.xlsx" \l "'Table 2 '!A2) |  | [81.0](\\\\IHADTCSV\\Redirect$\\Teacher\\seino-ju\\Documents\\清野\\〓Table+1.2.3.4.5-2江夏1017修正.xlsx" \l "'Table 2 '!A2) | [±](\\\\IHADTCSV\\Redirect$\\Teacher\\seino-ju\\Documents\\清野\\〓Table+1.2.3.4.5-2江夏1017修正.xlsx" \l "'Table 2 '!A2) | [17.1](\\\\IHADTCSV\\Redirect$\\Teacher\\seino-ju\\Documents\\清野\\〓Table+1.2.3.4.5-2江夏1017修正.xlsx" \l "'Table 2 '!A2) |  | [76.2](\\\\IHADTCSV\\Redirect$\\Teacher\\seino-ju\\Documents\\清野\\〓Table+1.2.3.4.5-2江夏1017修正.xlsx" \l "'Table 2 '!A2) | [±](\\\\IHADTCSV\\Redirect$\\Teacher\\seino-ju\\Documents\\清野\\〓Table+1.2.3.4.5-2江夏1017修正.xlsx" \l "'Table 2 '!A2) | [15.6](\\\\IHADTCSV\\Redirect$\\Teacher\\seino-ju\\Documents\\清野\\〓Table+1.2.3.4.5-2江夏1017修正.xlsx" \l "'Table 2 '!A2) |  | [74.5](\\\\IHADTCSV\\Redirect$\\Teacher\\seino-ju\\Documents\\清野\\〓Table+1.2.3.4.5-2江夏1017修正.xlsx" \l "'Table 2 '!A2) | [±](\\\\IHADTCSV\\Redirect$\\Teacher\\seino-ju\\Documents\\清野\\〓Table+1.2.3.4.5-2江夏1017修正.xlsx" \l "'Table 2 '!A2) | [30.1](\\\\IHADTCSV\\Redirect$\\Teacher\\seino-ju\\Documents\\清野\\〓Table+1.2.3.4.5-2江夏1017修正.xlsx" \l "'Table 2 '!A2) |  | [78.4](\\\\IHADTCSV\\Redirect$\\Teacher\\seino-ju\\Documents\\清野\\〓Table+1.2.3.4.5-2江夏1017修正.xlsx" \l "'Table 2 '!A2) | [±](\\\\IHADTCSV\\Redirect$\\Teacher\\seino-ju\\Documents\\清野\\〓Table+1.2.3.4.5-2江夏1017修正.xlsx" \l "'Table 2 '!A2) | [23.4](\\\\IHADTCSV\\Redirect$\\Teacher\\seino-ju\\Documents\\清野\\〓Table+1.2.3.4.5-2江夏1017修正.xlsx" \l "'Table 2 '!A2) |  | [74.5](\\\\IHADTCSV\\Redirect$\\Teacher\\seino-ju\\Documents\\清野\\〓Table+1.2.3.4.5-2江夏1017修正.xlsx" \l "'Table 2 '!A2) | [±](\\\\IHADTCSV\\Redirect$\\Teacher\\seino-ju\\Documents\\清野\\〓Table+1.2.3.4.5-2江夏1017修正.xlsx" \l "'Table 2 '!A2) | [25.1](\\\\IHADTCSV\\Redirect$\\Teacher\\seino-ju\\Documents\\清野\\〓Table+1.2.3.4.5-2江夏1017修正.xlsx" \l "'Table 2 '!A2) |  |  | [0.529](\\\\IHADTCSV\\Redirect$\\Teacher\\seino-ju\\Documents\\清野\\〓Table+1.2.3.4.5-2江夏1017修正.xlsx" \l "'Table 2 '!A2) |
| [Protein (%)](\\\\IHADTCSV\\Redirect$\\Teacher\\seino-ju\\Documents\\清野\\〓Table+1.2.3.4.5-2江夏1017修正.xlsx" \l "'Table 2 '!A2) | [50.0](\\\\IHADTCSV\\Redirect$\\Teacher\\seino-ju\\Documents\\清野\\〓Table+1.2.3.4.5-2江夏1017修正.xlsx" \l "'Table 2 '!A2) | [±](\\\\IHADTCSV\\Redirect$\\Teacher\\seino-ju\\Documents\\清野\\〓Table+1.2.3.4.5-2江夏1017修正.xlsx" \l "'Table 2 '!A2) | [28.5](\\\\IHADTCSV\\Redirect$\\Teacher\\seino-ju\\Documents\\清野\\〓Table+1.2.3.4.5-2江夏1017修正.xlsx" \l "'Table 2 '!A2) |  | [78.6](\\\\IHADTCSV\\Redirect$\\Teacher\\seino-ju\\Documents\\清野\\〓Table+1.2.3.4.5-2江夏1017修正.xlsx" \l "'Table 2 '!A2) | [±](\\\\IHADTCSV\\Redirect$\\Teacher\\seino-ju\\Documents\\清野\\〓Table+1.2.3.4.5-2江夏1017修正.xlsx" \l "'Table 2 '!A2) | [28.1](\\\\IHADTCSV\\Redirect$\\Teacher\\seino-ju\\Documents\\清野\\〓Table+1.2.3.4.5-2江夏1017修正.xlsx" \l "'Table 2 '!A2) |  | [81.0](\\\\IHADTCSV\\Redirect$\\Teacher\\seino-ju\\Documents\\清野\\〓Table+1.2.3.4.5-2江夏1017修正.xlsx" \l "'Table 2 '!A2) | [±](\\\\IHADTCSV\\Redirect$\\Teacher\\seino-ju\\Documents\\清野\\〓Table+1.2.3.4.5-2江夏1017修正.xlsx" \l "'Table 2 '!A2) | [21.5](\\\\IHADTCSV\\Redirect$\\Teacher\\seino-ju\\Documents\\清野\\〓Table+1.2.3.4.5-2江夏1017修正.xlsx" \l "'Table 2 '!A2) |  | [56.9](\\\\IHADTCSV\\Redirect$\\Teacher\\seino-ju\\Documents\\清野\\〓Table+1.2.3.4.5-2江夏1017修正.xlsx" \l "'Table 2 '!A2) | [±](\\\\IHADTCSV\\Redirect$\\Teacher\\seino-ju\\Documents\\清野\\〓Table+1.2.3.4.5-2江夏1017修正.xlsx" \l "'Table 2 '!A2) | [22.9](\\\\IHADTCSV\\Redirect$\\Teacher\\seino-ju\\Documents\\清野\\〓Table+1.2.3.4.5-2江夏1017修正.xlsx" \l "'Table 2 '!A2) |  | [72.5](\\\\IHADTCSV\\Redirect$\\Teacher\\seino-ju\\Documents\\清野\\〓Table+1.2.3.4.5-2江夏1017修正.xlsx" \l "'Table 2 '!A2) | [±](\\\\IHADTCSV\\Redirect$\\Teacher\\seino-ju\\Documents\\清野\\〓Table+1.2.3.4.5-2江夏1017修正.xlsx" \l "'Table 2 '!A2) | [27.0](\\\\IHADTCSV\\Redirect$\\Teacher\\seino-ju\\Documents\\清野\\〓Table+1.2.3.4.5-2江夏1017修正.xlsx" \l "'Table 2 '!A2) |  | [68.6](\\\\IHADTCSV\\Redirect$\\Teacher\\seino-ju\\Documents\\清野\\〓Table+1.2.3.4.5-2江夏1017修正.xlsx" \l "'Table 2 '!A2) | [±](\\\\IHADTCSV\\Redirect$\\Teacher\\seino-ju\\Documents\\清野\\〓Table+1.2.3.4.5-2江夏1017修正.xlsx" \l "'Table 2 '!A2) | [24.9](\\\\IHADTCSV\\Redirect$\\Teacher\\seino-ju\\Documents\\清野\\〓Table+1.2.3.4.5-2江夏1017修正.xlsx" \l "'Table 2 '!A2) |  |  | [0.463](\\\\IHADTCSV\\Redirect$\\Teacher\\seino-ju\\Documents\\清野\\〓Table+1.2.3.4.5-2江夏1017修正.xlsx" \l "'Table 2 '!A2) |
| **[TSRQ](\\\\IHADTCSV\\Redirect$\\Teacher\\seino-ju\\Documents\\清野\\〓Table+1.2.3.4.5-2江夏1017修正.xlsx" \l "'Table 2 '!A2)** | |  |  |  |  |  |  |  |  |  |  |  |  |  |  |  |  |  |  |  |  |  |  |  |  |  |  |
|  | [Autonomous motivation subscale](\\\\IHADTCSV\\Redirect$\\Teacher\\seino-ju\\Documents\\清野\\〓Table+1.2.3.4.5-2江夏1017修正.xlsx" \l "'Table 2 '!A2) | [5.05](\\\\IHADTCSV\\Redirect$\\Teacher\\seino-ju\\Documents\\清野\\〓Table+1.2.3.4.5-2江夏1017修正.xlsx" \l "'Table 2 '!A2) | [±](\\\\IHADTCSV\\Redirect$\\Teacher\\seino-ju\\Documents\\清野\\〓Table+1.2.3.4.5-2江夏1017修正.xlsx" \l "'Table 2 '!A2) | [0.96](\\\\IHADTCSV\\Redirect$\\Teacher\\seino-ju\\Documents\\清野\\〓Table+1.2.3.4.5-2江夏1017修正.xlsx" \l "'Table 2 '!A2) |  | [5.48](\\\\IHADTCSV\\Redirect$\\Teacher\\seino-ju\\Documents\\清野\\〓Table+1.2.3.4.5-2江夏1017修正.xlsx" \l "'Table 2 '!A2) | [±](\\\\IHADTCSV\\Redirect$\\Teacher\\seino-ju\\Documents\\清野\\〓Table+1.2.3.4.5-2江夏1017修正.xlsx" \l "'Table 2 '!A2) | [0.93](\\\\IHADTCSV\\Redirect$\\Teacher\\seino-ju\\Documents\\清野\\〓Table+1.2.3.4.5-2江夏1017修正.xlsx" \l "'Table 2 '!A2) |  | [5.44](\\\\IHADTCSV\\Redirect$\\Teacher\\seino-ju\\Documents\\清野\\〓Table+1.2.3.4.5-2江夏1017修正.xlsx" \l "'Table 2 '!A2) | [±](\\\\IHADTCSV\\Redirect$\\Teacher\\seino-ju\\Documents\\清野\\〓Table+1.2.3.4.5-2江夏1017修正.xlsx" \l "'Table 2 '!A2) | [1.09](\\\\IHADTCSV\\Redirect$\\Teacher\\seino-ju\\Documents\\清野\\〓Table+1.2.3.4.5-2江夏1017修正.xlsx" \l "'Table 2 '!A2) |  | [5.29](\\\\IHADTCSV\\Redirect$\\Teacher\\seino-ju\\Documents\\清野\\〓Table+1.2.3.4.5-2江夏1017修正.xlsx" \l "'Table 2 '!A2) | [±](\\\\IHADTCSV\\Redirect$\\Teacher\\seino-ju\\Documents\\清野\\〓Table+1.2.3.4.5-2江夏1017修正.xlsx" \l "'Table 2 '!A2) | [1.34](\\\\IHADTCSV\\Redirect$\\Teacher\\seino-ju\\Documents\\清野\\〓Table+1.2.3.4.5-2江夏1017修正.xlsx" \l "'Table 2 '!A2) |  | [5.49](\\\\IHADTCSV\\Redirect$\\Teacher\\seino-ju\\Documents\\清野\\〓Table+1.2.3.4.5-2江夏1017修正.xlsx" \l "'Table 2 '!A2) | [±](\\\\IHADTCSV\\Redirect$\\Teacher\\seino-ju\\Documents\\清野\\〓Table+1.2.3.4.5-2江夏1017修正.xlsx" \l "'Table 2 '!A2) | [0.99](\\\\IHADTCSV\\Redirect$\\Teacher\\seino-ju\\Documents\\清野\\〓Table+1.2.3.4.5-2江夏1017修正.xlsx" \l "'Table 2 '!A2) |  | [5.40](\\\\IHADTCSV\\Redirect$\\Teacher\\seino-ju\\Documents\\清野\\〓Table+1.2.3.4.5-2江夏1017修正.xlsx" \l "'Table 2 '!A2) | [±](\\\\IHADTCSV\\Redirect$\\Teacher\\seino-ju\\Documents\\清野\\〓Table+1.2.3.4.5-2江夏1017修正.xlsx" \l "'Table 2 '!A2) | [1.06](\\\\IHADTCSV\\Redirect$\\Teacher\\seino-ju\\Documents\\清野\\〓Table+1.2.3.4.5-2江夏1017修正.xlsx" \l "'Table 2 '!A2) |  |  | [0.568](\\\\IHADTCSV\\Redirect$\\Teacher\\seino-ju\\Documents\\清野\\〓Table+1.2.3.4.5-2江夏1017修正.xlsx" \l "'Table 2 '!A2) |
|  | [Externally controlled motivation subscale](\\\\IHADTCSV\\Redirect$\\Teacher\\seino-ju\\Documents\\清野\\〓Table+1.2.3.4.5-2江夏1017修正.xlsx" \l "'Table 2 '!A2) | [3.07](\\\\IHADTCSV\\Redirect$\\Teacher\\seino-ju\\Documents\\清野\\〓Table+1.2.3.4.5-2江夏1017修正.xlsx" \l "'Table 2 '!A2) | [±](\\\\IHADTCSV\\Redirect$\\Teacher\\seino-ju\\Documents\\清野\\〓Table+1.2.3.4.5-2江夏1017修正.xlsx" \l "'Table 2 '!A2) | [1.07](\\\\IHADTCSV\\Redirect$\\Teacher\\seino-ju\\Documents\\清野\\〓Table+1.2.3.4.5-2江夏1017修正.xlsx" \l "'Table 2 '!A2) |  | [2.81](\\\\IHADTCSV\\Redirect$\\Teacher\\seino-ju\\Documents\\清野\\〓Table+1.2.3.4.5-2江夏1017修正.xlsx" \l "'Table 2 '!A2) | [±](\\\\IHADTCSV\\Redirect$\\Teacher\\seino-ju\\Documents\\清野\\〓Table+1.2.3.4.5-2江夏1017修正.xlsx" \l "'Table 2 '!A2) | [1.12](\\\\IHADTCSV\\Redirect$\\Teacher\\seino-ju\\Documents\\清野\\〓Table+1.2.3.4.5-2江夏1017修正.xlsx" \l "'Table 2 '!A2) |  | [3.27](\\\\IHADTCSV\\Redirect$\\Teacher\\seino-ju\\Documents\\清野\\〓Table+1.2.3.4.5-2江夏1017修正.xlsx" \l "'Table 2 '!A2) | [±](\\\\IHADTCSV\\Redirect$\\Teacher\\seino-ju\\Documents\\清野\\〓Table+1.2.3.4.5-2江夏1017修正.xlsx" \l "'Table 2 '!A2) | [1.34](\\\\IHADTCSV\\Redirect$\\Teacher\\seino-ju\\Documents\\清野\\〓Table+1.2.3.4.5-2江夏1017修正.xlsx" \l "'Table 2 '!A2) |  | [2.92](\\\\IHADTCSV\\Redirect$\\Teacher\\seino-ju\\Documents\\清野\\〓Table+1.2.3.4.5-2江夏1017修正.xlsx" \l "'Table 2 '!A2) | [±](\\\\IHADTCSV\\Redirect$\\Teacher\\seino-ju\\Documents\\清野\\〓Table+1.2.3.4.5-2江夏1017修正.xlsx" \l "'Table 2 '!A2) | [1.12](\\\\IHADTCSV\\Redirect$\\Teacher\\seino-ju\\Documents\\清野\\〓Table+1.2.3.4.5-2江夏1017修正.xlsx" \l "'Table 2 '!A2) |  | [3.23](\\\\IHADTCSV\\Redirect$\\Teacher\\seino-ju\\Documents\\清野\\〓Table+1.2.3.4.5-2江夏1017修正.xlsx" \l "'Table 2 '!A2) | [±](\\\\IHADTCSV\\Redirect$\\Teacher\\seino-ju\\Documents\\清野\\〓Table+1.2.3.4.5-2江夏1017修正.xlsx" \l "'Table 2 '!A2) | [0.92](\\\\IHADTCSV\\Redirect$\\Teacher\\seino-ju\\Documents\\清野\\〓Table+1.2.3.4.5-2江夏1017修正.xlsx" \l "'Table 2 '!A2) |  | [3.70](\\\\IHADTCSV\\Redirect$\\Teacher\\seino-ju\\Documents\\清野\\〓Table+1.2.3.4.5-2江夏1017修正.xlsx" \l "'Table 2 '!A2) | [±](\\\\IHADTCSV\\Redirect$\\Teacher\\seino-ju\\Documents\\清野\\〓Table+1.2.3.4.5-2江夏1017修正.xlsx" \l "'Table 2 '!A2) | [1.34](\\\\IHADTCSV\\Redirect$\\Teacher\\seino-ju\\Documents\\清野\\〓Table+1.2.3.4.5-2江夏1017修正.xlsx" \l "'Table 2 '!A2) |  |  | [0.708](\\\\IHADTCSV\\Redirect$\\Teacher\\seino-ju\\Documents\\清野\\〓Table+1.2.3.4.5-2江夏1017修正.xlsx" \l "'Table 2 '!A2) |
|  | [Nonmotivation subscale](\\\\IHADTCSV\\Redirect$\\Teacher\\seino-ju\\Documents\\清野\\〓Table+1.2.3.4.5-2江夏1017修正.xlsx" \l "'Table 2 '!A2) | [2.74](\\\\IHADTCSV\\Redirect$\\Teacher\\seino-ju\\Documents\\清野\\〓Table+1.2.3.4.5-2江夏1017修正.xlsx" \l "'Table 2 '!A2) | [±](\\\\IHADTCSV\\Redirect$\\Teacher\\seino-ju\\Documents\\清野\\〓Table+1.2.3.4.5-2江夏1017修正.xlsx" \l "'Table 2 '!A2) | [1.10](\\\\IHADTCSV\\Redirect$\\Teacher\\seino-ju\\Documents\\清野\\〓Table+1.2.3.4.5-2江夏1017修正.xlsx" \l "'Table 2 '!A2) |  | [2.67](\\\\IHADTCSV\\Redirect$\\Teacher\\seino-ju\\Documents\\清野\\〓Table+1.2.3.4.5-2江夏1017修正.xlsx" \l "'Table 2 '!A2) | [±](\\\\IHADTCSV\\Redirect$\\Teacher\\seino-ju\\Documents\\清野\\〓Table+1.2.3.4.5-2江夏1017修正.xlsx" \l "'Table 2 '!A2) | [0.93](\\\\IHADTCSV\\Redirect$\\Teacher\\seino-ju\\Documents\\清野\\〓Table+1.2.3.4.5-2江夏1017修正.xlsx" \l "'Table 2 '!A2) |  | [3.14](\\\\IHADTCSV\\Redirect$\\Teacher\\seino-ju\\Documents\\清野\\〓Table+1.2.3.4.5-2江夏1017修正.xlsx" \l "'Table 2 '!A2) | [±](\\\\IHADTCSV\\Redirect$\\Teacher\\seino-ju\\Documents\\清野\\〓Table+1.2.3.4.5-2江夏1017修正.xlsx" \l "'Table 2 '!A2) | [1.25](\\\\IHADTCSV\\Redirect$\\Teacher\\seino-ju\\Documents\\清野\\〓Table+1.2.3.4.5-2江夏1017修正.xlsx" \l "'Table 2 '!A2) |  | [3.08](\\\\IHADTCSV\\Redirect$\\Teacher\\seino-ju\\Documents\\清野\\〓Table+1.2.3.4.5-2江夏1017修正.xlsx" \l "'Table 2 '!A2) | [±](\\\\IHADTCSV\\Redirect$\\Teacher\\seino-ju\\Documents\\清野\\〓Table+1.2.3.4.5-2江夏1017修正.xlsx" \l "'Table 2 '!A2) | [1.48](\\\\IHADTCSV\\Redirect$\\Teacher\\seino-ju\\Documents\\清野\\〓Table+1.2.3.4.5-2江夏1017修正.xlsx" \l "'Table 2 '!A2) |  | [3.18](\\\\IHADTCSV\\Redirect$\\Teacher\\seino-ju\\Documents\\清野\\〓Table+1.2.3.4.5-2江夏1017修正.xlsx" \l "'Table 2 '!A2) | [±](\\\\IHADTCSV\\Redirect$\\Teacher\\seino-ju\\Documents\\清野\\〓Table+1.2.3.4.5-2江夏1017修正.xlsx" \l "'Table 2 '!A2) | [1.22](\\\\IHADTCSV\\Redirect$\\Teacher\\seino-ju\\Documents\\清野\\〓Table+1.2.3.4.5-2江夏1017修正.xlsx" \l "'Table 2 '!A2) |  | [3.12](\\\\IHADTCSV\\Redirect$\\Teacher\\seino-ju\\Documents\\清野\\〓Table+1.2.3.4.5-2江夏1017修正.xlsx" \l "'Table 2 '!A2) | [±](\\\\IHADTCSV\\Redirect$\\Teacher\\seino-ju\\Documents\\清野\\〓Table+1.2.3.4.5-2江夏1017修正.xlsx" \l "'Table 2 '!A2) | [1.41](\\\\IHADTCSV\\Redirect$\\Teacher\\seino-ju\\Documents\\清野\\〓Table+1.2.3.4.5-2江夏1017修正.xlsx" \l "'Table 2 '!A2) |  |  | [0.482](\\\\IHADTCSV\\Redirect$\\Teacher\\seino-ju\\Documents\\清野\\〓Table+1.2.3.4.5-2江夏1017修正.xlsx" \l "'Table 2 '!A2) |
|  | [Relative Autonomous Motivation Index](\\\\IHADTCSV\\Redirect$\\Teacher\\seino-ju\\Documents\\清野\\〓Table+1.2.3.4.5-2江夏1017修正.xlsx" \l "'Table 2 '!A2) | [1.98](\\\\IHADTCSV\\Redirect$\\Teacher\\seino-ju\\Documents\\清野\\〓Table+1.2.3.4.5-2江夏1017修正.xlsx" \l "'Table 2 '!A2) | [±](\\\\IHADTCSV\\Redirect$\\Teacher\\seino-ju\\Documents\\清野\\〓Table+1.2.3.4.5-2江夏1017修正.xlsx" \l "'Table 2 '!A2) | [1.62](\\\\IHADTCSV\\Redirect$\\Teacher\\seino-ju\\Documents\\清野\\〓Table+1.2.3.4.5-2江夏1017修正.xlsx" \l "'Table 2 '!A2) |  | [2.67](\\\\IHADTCSV\\Redirect$\\Teacher\\seino-ju\\Documents\\清野\\〓Table+1.2.3.4.5-2江夏1017修正.xlsx" \l "'Table 2 '!A2) | [±](\\\\IHADTCSV\\Redirect$\\Teacher\\seino-ju\\Documents\\清野\\〓Table+1.2.3.4.5-2江夏1017修正.xlsx" \l "'Table 2 '!A2) | [1.64](\\\\IHADTCSV\\Redirect$\\Teacher\\seino-ju\\Documents\\清野\\〓Table+1.2.3.4.5-2江夏1017修正.xlsx" \l "'Table 2 '!A2) |  | [2.17](\\\\IHADTCSV\\Redirect$\\Teacher\\seino-ju\\Documents\\清野\\〓Table+1.2.3.4.5-2江夏1017修正.xlsx" \l "'Table 2 '!A2) | [±](\\\\IHADTCSV\\Redirect$\\Teacher\\seino-ju\\Documents\\清野\\〓Table+1.2.3.4.5-2江夏1017修正.xlsx" \l "'Table 2 '!A2) | [1.93](\\\\IHADTCSV\\Redirect$\\Teacher\\seino-ju\\Documents\\清野\\〓Table+1.2.3.4.5-2江夏1017修正.xlsx" \l "'Table 2 '!A2) |  | [2.37](\\\\IHADTCSV\\Redirect$\\Teacher\\seino-ju\\Documents\\清野\\〓Table+1.2.3.4.5-2江夏1017修正.xlsx" \l "'Table 2 '!A2) | [±](\\\\IHADTCSV\\Redirect$\\Teacher\\seino-ju\\Documents\\清野\\〓Table+1.2.3.4.5-2江夏1017修正.xlsx" \l "'Table 2 '!A2) | [1.53](\\\\IHADTCSV\\Redirect$\\Teacher\\seino-ju\\Documents\\清野\\〓Table+1.2.3.4.5-2江夏1017修正.xlsx" \l "'Table 2 '!A2) |  | [2.26](\\\\IHADTCSV\\Redirect$\\Teacher\\seino-ju\\Documents\\清野\\〓Table+1.2.3.4.5-2江夏1017修正.xlsx" \l "'Table 2 '!A2) | [±](\\\\IHADTCSV\\Redirect$\\Teacher\\seino-ju\\Documents\\清野\\〓Table+1.2.3.4.5-2江夏1017修正.xlsx" \l "'Table 2 '!A2) | [1.19](\\\\IHADTCSV\\Redirect$\\Teacher\\seino-ju\\Documents\\清野\\〓Table+1.2.3.4.5-2江夏1017修正.xlsx" \l "'Table 2 '!A2) |  | [1.71](\\\\IHADTCSV\\Redirect$\\Teacher\\seino-ju\\Documents\\清野\\〓Table+1.2.3.4.5-2江夏1017修正.xlsx" \l "'Table 2 '!A2) | [±](\\\\IHADTCSV\\Redirect$\\Teacher\\seino-ju\\Documents\\清野\\〓Table+1.2.3.4.5-2江夏1017修正.xlsx" \l "'Table 2 '!A2) | [1.89](\\\\IHADTCSV\\Redirect$\\Teacher\\seino-ju\\Documents\\清野\\〓Table+1.2.3.4.5-2江夏1017修正.xlsx" \l "'Table 2 '!A2) |  |  | [0.490](\\\\IHADTCSV\\Redirect$\\Teacher\\seino-ju\\Documents\\清野\\〓Table+1.2.3.4.5-2江夏1017修正.xlsx" \l "'Table 2 '!A2) |

† No paired t-test was performed for differences between groups before the start of the study.

SD: Standard Deviation

SNK: Sports Nutrition Knowledge

TSRQ: Treatment Self-Regulation Questionnaire

**Table S3.** Between-group differences in BDHQ (prior)

|  |  | [Self-Determination Theory group（](\\\\IHADTCSV\\Redirect$\\Teacher\\seino-ju\\Documents\\清野\\〓Table+1.2.3.4.5-2江夏1017修正.xlsx" \l "'Table 3'!A2)*[n](\\\\IHADTCSV\\Redirect$\\Teacher\\seino-ju\\Documents\\清野\\〓Table+1.2.3.4.5-2江夏1017修正.xlsx" \l "'Table 3'!A2)* [= 14）](\\\\IHADTCSV\\Redirect$\\Teacher\\seino-ju\\Documents\\清野\\〓Table+1.2.3.4.5-2江夏1017修正.xlsx" \l "'Table 3'!A2) | | | | | | | | | | |  |  | [Control group（](\\\\IHADTCSV\\Redirect$\\Teacher\\seino-ju\\Documents\\清野\\〓Table+1.2.3.4.5-2江夏1017修正.xlsx" \l "'Table 3'!A2)*[n](\\\\IHADTCSV\\Redirect$\\Teacher\\seino-ju\\Documents\\清野\\〓Table+1.2.3.4.5-2江夏1017修正.xlsx" \l "'Table 3'!A2)* [= 17）](\\\\IHADTCSV\\Redirect$\\Teacher\\seino-ju\\Documents\\清野\\〓Table+1.2.3.4.5-2江夏1017修正.xlsx" \l "'Table 3'!A2) | | | | | | | | | | |  | *[p](\\\\IHADTCSV\\Redirect$\\Teacher\\seino-ju\\Documents\\清野\\〓Table+1.2.3.4.5-2江夏1017修正.xlsx" \l "'Table 3'!A2)* [value](\\\\IHADTCSV\\Redirect$\\Teacher\\seino-ju\\Documents\\清野\\〓Table+1.2.3.4.5-2江夏1017修正.xlsx" \l "'Table 3'!A2)[†](\\\\IHADTCSV\\Redirect$\\Teacher\\seino-ju\\Documents\\清野\\〓Table+1.2.3.4.5-2江夏1017修正.xlsx" \l "'Table 3'!A2) | | |
| --- | --- | --- | --- | --- | --- | --- | --- | --- | --- | --- | --- | --- | --- | --- | --- | --- | --- | --- | --- | --- | --- | --- | --- | --- | --- | --- | --- | --- | --- |
|  |  | [Before](\\\\IHADTCSV\\Redirect$\\Teacher\\seino-ju\\Documents\\清野\\〓Table+1.2.3.4.5-2江夏1017修正.xlsx" \l "'Table 3'!A2) | | |  | [Immediately after](\\\\IHADTCSV\\Redirect$\\Teacher\\seino-ju\\Documents\\清野\\〓Table+1.2.3.4.5-2江夏1017修正.xlsx" \l "'Table 3'!A2) | | |  | [After three months](\\\\IHADTCSV\\Redirect$\\Teacher\\seino-ju\\Documents\\清野\\〓Table+1.2.3.4.5-2江夏1017修正.xlsx" \l "'Table 3'!A2) | | |  |  | [Before](\\\\IHADTCSV\\Redirect$\\Teacher\\seino-ju\\Documents\\清野\\〓Table+1.2.3.4.5-2江夏1017修正.xlsx" \l "'Table 3'!A2) | | |  | [Immediately after](\\\\IHADTCSV\\Redirect$\\Teacher\\seino-ju\\Documents\\清野\\〓Table+1.2.3.4.5-2江夏1017修正.xlsx" \l "'Table 3'!A2) | | |  | [After three months](\\\\IHADTCSV\\Redirect$\\Teacher\\seino-ju\\Documents\\清野\\〓Table+1.2.3.4.5-2江夏1017修正.xlsx" \l "'Table 3'!A2) | | |  |
|  |  | [mean value±SD](\\\\IHADTCSV\\Redirect$\\Teacher\\seino-ju\\Documents\\清野\\〓Table+1.2.3.4.5-2江夏1017修正.xlsx" \l "'Table 3'!A2) | | |  | [mean value±SD](\\\\IHADTCSV\\Redirect$\\Teacher\\seino-ju\\Documents\\清野\\〓Table+1.2.3.4.5-2江夏1017修正.xlsx" \l "'Table 3'!A2) | | |  | [mean value±SD](\\\\IHADTCSV\\Redirect$\\Teacher\\seino-ju\\Documents\\清野\\〓Table+1.2.3.4.5-2江夏1017修正.xlsx" \l "'Table 3'!A2) | | |  |  | [mean value±SD](\\\\IHADTCSV\\Redirect$\\Teacher\\seino-ju\\Documents\\清野\\〓Table+1.2.3.4.5-2江夏1017修正.xlsx" \l "'Table 3'!A2) | | |  | [mean value±SD](\\\\IHADTCSV\\Redirect$\\Teacher\\seino-ju\\Documents\\清野\\〓Table+1.2.3.4.5-2江夏1017修正.xlsx" \l "'Table 3'!A2) | | |  | [mean value±SD](\\\\IHADTCSV\\Redirect$\\Teacher\\seino-ju\\Documents\\清野\\〓Table+1.2.3.4.5-2江夏1017修正.xlsx" \l "'Table 3'!A2) | | |  |
| **[BDHQ (Nutrient intake)](\\\\IHADTCSV\\Redirect$\\Teacher\\seino-ju\\Documents\\清野\\〓Table+1.2.3.4.5-2江夏1017修正.xlsx" \l "'Table 3'!A2)** | |  |  |  |  |  |  |  |  |  |  |  |  |  |  |  |  |  |  |  |  |  |  |  |  |  |  |  |  |
|  | [Energy (kcal)](\\\\IHADTCSV\\Redirect$\\Teacher\\seino-ju\\Documents\\清野\\〓Table+1.2.3.4.5-2江夏1017修正.xlsx" \l "'Table 3'!A2) | [2764](\\\\IHADTCSV\\Redirect$\\Teacher\\seino-ju\\Documents\\清野\\〓Table+1.2.3.4.5-2江夏1017修正.xlsx" \l "'Table 3'!A2) | [±](\\\\IHADTCSV\\Redirect$\\Teacher\\seino-ju\\Documents\\清野\\〓Table+1.2.3.4.5-2江夏1017修正.xlsx" \l "'Table 3'!A2) | [912](\\\\IHADTCSV\\Redirect$\\Teacher\\seino-ju\\Documents\\清野\\〓Table+1.2.3.4.5-2江夏1017修正.xlsx" \l "'Table 3'!A2) |  | [3224](\\\\IHADTCSV\\Redirect$\\Teacher\\seino-ju\\Documents\\清野\\〓Table+1.2.3.4.5-2江夏1017修正.xlsx" \l "'Table 3'!A2) | [±](\\\\IHADTCSV\\Redirect$\\Teacher\\seino-ju\\Documents\\清野\\〓Table+1.2.3.4.5-2江夏1017修正.xlsx" \l "'Table 3'!A2) | [541](\\\\IHADTCSV\\Redirect$\\Teacher\\seino-ju\\Documents\\清野\\〓Table+1.2.3.4.5-2江夏1017修正.xlsx" \l "'Table 3'!A2) |  | [3295](\\\\IHADTCSV\\Redirect$\\Teacher\\seino-ju\\Documents\\清野\\〓Table+1.2.3.4.5-2江夏1017修正.xlsx" \l "'Table 3'!A2) | [±](\\\\IHADTCSV\\Redirect$\\Teacher\\seino-ju\\Documents\\清野\\〓Table+1.2.3.4.5-2江夏1017修正.xlsx" \l "'Table 3'!A2) | [713](\\\\IHADTCSV\\Redirect$\\Teacher\\seino-ju\\Documents\\清野\\〓Table+1.2.3.4.5-2江夏1017修正.xlsx" \l "'Table 3'!A2) |  |  | [3000](\\\\IHADTCSV\\Redirect$\\Teacher\\seino-ju\\Documents\\清野\\〓Table+1.2.3.4.5-2江夏1017修正.xlsx" \l "'Table 3'!A2) | [±](\\\\IHADTCSV\\Redirect$\\Teacher\\seino-ju\\Documents\\清野\\〓Table+1.2.3.4.5-2江夏1017修正.xlsx" \l "'Table 3'!A2) | [679](\\\\IHADTCSV\\Redirect$\\Teacher\\seino-ju\\Documents\\清野\\〓Table+1.2.3.4.5-2江夏1017修正.xlsx" \l "'Table 3'!A2) |  | [3118](\\\\IHADTCSV\\Redirect$\\Teacher\\seino-ju\\Documents\\清野\\〓Table+1.2.3.4.5-2江夏1017修正.xlsx" \l "'Table 3'!A2) | [±](\\\\IHADTCSV\\Redirect$\\Teacher\\seino-ju\\Documents\\清野\\〓Table+1.2.3.4.5-2江夏1017修正.xlsx" \l "'Table 3'!A2) | [756](\\\\IHADTCSV\\Redirect$\\Teacher\\seino-ju\\Documents\\清野\\〓Table+1.2.3.4.5-2江夏1017修正.xlsx" \l "'Table 3'!A2) |  | [3165](\\\\IHADTCSV\\Redirect$\\Teacher\\seino-ju\\Documents\\清野\\〓Table+1.2.3.4.5-2江夏1017修正.xlsx" \l "'Table 3'!A2) | [±](\\\\IHADTCSV\\Redirect$\\Teacher\\seino-ju\\Documents\\清野\\〓Table+1.2.3.4.5-2江夏1017修正.xlsx" \l "'Table 3'!A2) | [919](\\\\IHADTCSV\\Redirect$\\Teacher\\seino-ju\\Documents\\清野\\〓Table+1.2.3.4.5-2江夏1017修正.xlsx" \l "'Table 3'!A2) |  |  | [0.416](\\\\IHADTCSV\\Redirect$\\Teacher\\seino-ju\\Documents\\清野\\〓Table+1.2.3.4.5-2江夏1017修正.xlsx" \l "'Table 3'!A2) |  |
| [Protein (g)](\\\\IHADTCSV\\Redirect$\\Teacher\\seino-ju\\Documents\\清野\\〓Table+1.2.3.4.5-2江夏1017修正.xlsx" \l "'Table 3'!A2) | [83.5](\\\\IHADTCSV\\Redirect$\\Teacher\\seino-ju\\Documents\\清野\\〓Table+1.2.3.4.5-2江夏1017修正.xlsx" \l "'Table 3'!A2) | [±](\\\\IHADTCSV\\Redirect$\\Teacher\\seino-ju\\Documents\\清野\\〓Table+1.2.3.4.5-2江夏1017修正.xlsx" \l "'Table 3'!A2) | [32.9](\\\\IHADTCSV\\Redirect$\\Teacher\\seino-ju\\Documents\\清野\\〓Table+1.2.3.4.5-2江夏1017修正.xlsx" \l "'Table 3'!A2) |  | [95.8](\\\\IHADTCSV\\Redirect$\\Teacher\\seino-ju\\Documents\\清野\\〓Table+1.2.3.4.5-2江夏1017修正.xlsx" \l "'Table 3'!A2) | [±](\\\\IHADTCSV\\Redirect$\\Teacher\\seino-ju\\Documents\\清野\\〓Table+1.2.3.4.5-2江夏1017修正.xlsx" \l "'Table 3'!A2) | [24.8](\\\\IHADTCSV\\Redirect$\\Teacher\\seino-ju\\Documents\\清野\\〓Table+1.2.3.4.5-2江夏1017修正.xlsx" \l "'Table 3'!A2) |  | [97.6](\\\\IHADTCSV\\Redirect$\\Teacher\\seino-ju\\Documents\\清野\\〓Table+1.2.3.4.5-2江夏1017修正.xlsx" \l "'Table 3'!A2) | [±](\\\\IHADTCSV\\Redirect$\\Teacher\\seino-ju\\Documents\\清野\\〓Table+1.2.3.4.5-2江夏1017修正.xlsx" \l "'Table 3'!A2) | [28.7](\\\\IHADTCSV\\Redirect$\\Teacher\\seino-ju\\Documents\\清野\\〓Table+1.2.3.4.5-2江夏1017修正.xlsx" \l "'Table 3'!A2) |  |  | [94.1](\\\\IHADTCSV\\Redirect$\\Teacher\\seino-ju\\Documents\\清野\\〓Table+1.2.3.4.5-2江夏1017修正.xlsx" \l "'Table 3'!A2) | [±](\\\\IHADTCSV\\Redirect$\\Teacher\\seino-ju\\Documents\\清野\\〓Table+1.2.3.4.5-2江夏1017修正.xlsx" \l "'Table 3'!A2) | [27.2](\\\\IHADTCSV\\Redirect$\\Teacher\\seino-ju\\Documents\\清野\\〓Table+1.2.3.4.5-2江夏1017修正.xlsx" \l "'Table 3'!A2) |  | [95.9](\\\\IHADTCSV\\Redirect$\\Teacher\\seino-ju\\Documents\\清野\\〓Table+1.2.3.4.5-2江夏1017修正.xlsx" \l "'Table 3'!A2) | [±](\\\\IHADTCSV\\Redirect$\\Teacher\\seino-ju\\Documents\\清野\\〓Table+1.2.3.4.5-2江夏1017修正.xlsx" \l "'Table 3'!A2) | [26.3](\\\\IHADTCSV\\Redirect$\\Teacher\\seino-ju\\Documents\\清野\\〓Table+1.2.3.4.5-2江夏1017修正.xlsx" \l "'Table 3'!A2) |  | [104.2](\\\\IHADTCSV\\Redirect$\\Teacher\\seino-ju\\Documents\\清野\\〓Table+1.2.3.4.5-2江夏1017修正.xlsx" \l "'Table 3'!A2) | [±](\\\\IHADTCSV\\Redirect$\\Teacher\\seino-ju\\Documents\\清野\\〓Table+1.2.3.4.5-2江夏1017修正.xlsx" \l "'Table 3'!A2) | [34.6](\\\\IHADTCSV\\Redirect$\\Teacher\\seino-ju\\Documents\\清野\\〓Table+1.2.3.4.5-2江夏1017修正.xlsx" \l "'Table 3'!A2) |  |  | [0.334](\\\\IHADTCSV\\Redirect$\\Teacher\\seino-ju\\Documents\\清野\\〓Table+1.2.3.4.5-2江夏1017修正.xlsx" \l "'Table 3'!A2) |  |
| [Fat (g)](\\\\IHADTCSV\\Redirect$\\Teacher\\seino-ju\\Documents\\清野\\〓Table+1.2.3.4.5-2江夏1017修正.xlsx" \l "'Table 3'!A2) | [63.5](\\\\IHADTCSV\\Redirect$\\Teacher\\seino-ju\\Documents\\清野\\〓Table+1.2.3.4.5-2江夏1017修正.xlsx" \l "'Table 3'!A2) | [±](\\\\IHADTCSV\\Redirect$\\Teacher\\seino-ju\\Documents\\清野\\〓Table+1.2.3.4.5-2江夏1017修正.xlsx" \l "'Table 3'!A2) | [22.3](\\\\IHADTCSV\\Redirect$\\Teacher\\seino-ju\\Documents\\清野\\〓Table+1.2.3.4.5-2江夏1017修正.xlsx" \l "'Table 3'!A2) |  | [68.2](\\\\IHADTCSV\\Redirect$\\Teacher\\seino-ju\\Documents\\清野\\〓Table+1.2.3.4.5-2江夏1017修正.xlsx" \l "'Table 3'!A2) | [±](\\\\IHADTCSV\\Redirect$\\Teacher\\seino-ju\\Documents\\清野\\〓Table+1.2.3.4.5-2江夏1017修正.xlsx" \l "'Table 3'!A2) | [20.0](\\\\IHADTCSV\\Redirect$\\Teacher\\seino-ju\\Documents\\清野\\〓Table+1.2.3.4.5-2江夏1017修正.xlsx" \l "'Table 3'!A2) |  | [69.0](\\\\IHADTCSV\\Redirect$\\Teacher\\seino-ju\\Documents\\清野\\〓Table+1.2.3.4.5-2江夏1017修正.xlsx" \l "'Table 3'!A2) | [±](\\\\IHADTCSV\\Redirect$\\Teacher\\seino-ju\\Documents\\清野\\〓Table+1.2.3.4.5-2江夏1017修正.xlsx" \l "'Table 3'!A2) | [19.8](\\\\IHADTCSV\\Redirect$\\Teacher\\seino-ju\\Documents\\清野\\〓Table+1.2.3.4.5-2江夏1017修正.xlsx" \l "'Table 3'!A2) |  |  | [75.5](\\\\IHADTCSV\\Redirect$\\Teacher\\seino-ju\\Documents\\清野\\〓Table+1.2.3.4.5-2江夏1017修正.xlsx" \l "'Table 3'!A2) | [±](\\\\IHADTCSV\\Redirect$\\Teacher\\seino-ju\\Documents\\清野\\〓Table+1.2.3.4.5-2江夏1017修正.xlsx" \l "'Table 3'!A2) | [21.3](\\\\IHADTCSV\\Redirect$\\Teacher\\seino-ju\\Documents\\清野\\〓Table+1.2.3.4.5-2江夏1017修正.xlsx" \l "'Table 3'!A2) |  | [76.7](\\\\IHADTCSV\\Redirect$\\Teacher\\seino-ju\\Documents\\清野\\〓Table+1.2.3.4.5-2江夏1017修正.xlsx" \l "'Table 3'!A2) | [±](\\\\IHADTCSV\\Redirect$\\Teacher\\seino-ju\\Documents\\清野\\〓Table+1.2.3.4.5-2江夏1017修正.xlsx" \l "'Table 3'!A2) | [27.6](\\\\IHADTCSV\\Redirect$\\Teacher\\seino-ju\\Documents\\清野\\〓Table+1.2.3.4.5-2江夏1017修正.xlsx" \l "'Table 3'!A2) |  | [75.5](\\\\IHADTCSV\\Redirect$\\Teacher\\seino-ju\\Documents\\清野\\〓Table+1.2.3.4.5-2江夏1017修正.xlsx" \l "'Table 3'!A2) | [±](\\\\IHADTCSV\\Redirect$\\Teacher\\seino-ju\\Documents\\清野\\〓Table+1.2.3.4.5-2江夏1017修正.xlsx" \l "'Table 3'!A2) | [34.5](\\\\IHADTCSV\\Redirect$\\Teacher\\seino-ju\\Documents\\清野\\〓Table+1.2.3.4.5-2江夏1017修正.xlsx" \l "'Table 3'!A2) |  |  | [0.137](\\\\IHADTCSV\\Redirect$\\Teacher\\seino-ju\\Documents\\清野\\〓Table+1.2.3.4.5-2江夏1017修正.xlsx" \l "'Table 3'!A2) |  |
| [Carbohydrate (g)](\\\\IHADTCSV\\Redirect$\\Teacher\\seino-ju\\Documents\\清野\\〓Table+1.2.3.4.5-2江夏1017修正.xlsx" \l "'Table 3'!A2) | [448.5](\\\\IHADTCSV\\Redirect$\\Teacher\\seino-ju\\Documents\\清野\\〓Table+1.2.3.4.5-2江夏1017修正.xlsx" \l "'Table 3'!A2) | [±](\\\\IHADTCSV\\Redirect$\\Teacher\\seino-ju\\Documents\\清野\\〓Table+1.2.3.4.5-2江夏1017修正.xlsx" \l "'Table 3'!A2) | [148.8](\\\\IHADTCSV\\Redirect$\\Teacher\\seino-ju\\Documents\\清野\\〓Table+1.2.3.4.5-2江夏1017修正.xlsx" \l "'Table 3'!A2) |  | [539.8](\\\\IHADTCSV\\Redirect$\\Teacher\\seino-ju\\Documents\\清野\\〓Table+1.2.3.4.5-2江夏1017修正.xlsx" \l "'Table 3'!A2) | [±](\\\\IHADTCSV\\Redirect$\\Teacher\\seino-ju\\Documents\\清野\\〓Table+1.2.3.4.5-2江夏1017修正.xlsx" \l "'Table 3'!A2) | [93.3](\\\\IHADTCSV\\Redirect$\\Teacher\\seino-ju\\Documents\\清野\\〓Table+1.2.3.4.5-2江夏1017修正.xlsx" \l "'Table 3'!A2) |  | [551.2](\\\\IHADTCSV\\Redirect$\\Teacher\\seino-ju\\Documents\\清野\\〓Table+1.2.3.4.5-2江夏1017修正.xlsx" \l "'Table 3'!A2) | [±](\\\\IHADTCSV\\Redirect$\\Teacher\\seino-ju\\Documents\\清野\\〓Table+1.2.3.4.5-2江夏1017修正.xlsx" \l "'Table 3'!A2) | [118.5](\\\\IHADTCSV\\Redirect$\\Teacher\\seino-ju\\Documents\\清野\\〓Table+1.2.3.4.5-2江夏1017修正.xlsx" \l "'Table 3'!A2) |  |  | [468.3](\\\\IHADTCSV\\Redirect$\\Teacher\\seino-ju\\Documents\\清野\\〓Table+1.2.3.4.5-2江夏1017修正.xlsx" \l "'Table 3'!A2) | [±](\\\\IHADTCSV\\Redirect$\\Teacher\\seino-ju\\Documents\\清野\\〓Table+1.2.3.4.5-2江夏1017修正.xlsx" \l "'Table 3'!A2) | [124.4](\\\\IHADTCSV\\Redirect$\\Teacher\\seino-ju\\Documents\\清野\\〓Table+1.2.3.4.5-2江夏1017修正.xlsx" \l "'Table 3'!A2) |  | [494.7](\\\\IHADTCSV\\Redirect$\\Teacher\\seino-ju\\Documents\\清野\\〓Table+1.2.3.4.5-2江夏1017修正.xlsx" \l "'Table 3'!A2) | [±](\\\\IHADTCSV\\Redirect$\\Teacher\\seino-ju\\Documents\\清野\\〓Table+1.2.3.4.5-2江夏1017修正.xlsx" \l "'Table 3'!A2) | [117.4](\\\\IHADTCSV\\Redirect$\\Teacher\\seino-ju\\Documents\\清野\\〓Table+1.2.3.4.5-2江夏1017修正.xlsx" \l "'Table 3'!A2) |  | [499.7](\\\\IHADTCSV\\Redirect$\\Teacher\\seino-ju\\Documents\\清野\\〓Table+1.2.3.4.5-2江夏1017修正.xlsx" \l "'Table 3'!A2) | [±](\\\\IHADTCSV\\Redirect$\\Teacher\\seino-ju\\Documents\\清野\\〓Table+1.2.3.4.5-2江夏1017修正.xlsx" \l "'Table 3'!A2) | [132.4](\\\\IHADTCSV\\Redirect$\\Teacher\\seino-ju\\Documents\\清野\\〓Table+1.2.3.4.5-2江夏1017修正.xlsx" \l "'Table 3'!A2) |  |  | [0.690](\\\\IHADTCSV\\Redirect$\\Teacher\\seino-ju\\Documents\\清野\\〓Table+1.2.3.4.5-2江夏1017修正.xlsx" \l "'Table 3'!A2) |  |
| [Calcium (mg)](\\\\IHADTCSV\\Redirect$\\Teacher\\seino-ju\\Documents\\清野\\〓Table+1.2.3.4.5-2江夏1017修正.xlsx" \l "'Table 3'!A2) | [528.7](\\\\IHADTCSV\\Redirect$\\Teacher\\seino-ju\\Documents\\清野\\〓Table+1.2.3.4.5-2江夏1017修正.xlsx" \l "'Table 3'!A2) | [±](\\\\IHADTCSV\\Redirect$\\Teacher\\seino-ju\\Documents\\清野\\〓Table+1.2.3.4.5-2江夏1017修正.xlsx" \l "'Table 3'!A2) | [325.0](\\\\IHADTCSV\\Redirect$\\Teacher\\seino-ju\\Documents\\清野\\〓Table+1.2.3.4.5-2江夏1017修正.xlsx" \l "'Table 3'!A2) |  | [633.7](\\\\IHADTCSV\\Redirect$\\Teacher\\seino-ju\\Documents\\清野\\〓Table+1.2.3.4.5-2江夏1017修正.xlsx" \l "'Table 3'!A2) | [±](\\\\IHADTCSV\\Redirect$\\Teacher\\seino-ju\\Documents\\清野\\〓Table+1.2.3.4.5-2江夏1017修正.xlsx" \l "'Table 3'!A2) | [251.7](\\\\IHADTCSV\\Redirect$\\Teacher\\seino-ju\\Documents\\清野\\〓Table+1.2.3.4.5-2江夏1017修正.xlsx" \l "'Table 3'!A2) |  | [601.2](\\\\IHADTCSV\\Redirect$\\Teacher\\seino-ju\\Documents\\清野\\〓Table+1.2.3.4.5-2江夏1017修正.xlsx" \l "'Table 3'!A2) | [±](\\\\IHADTCSV\\Redirect$\\Teacher\\seino-ju\\Documents\\清野\\〓Table+1.2.3.4.5-2江夏1017修正.xlsx" \l "'Table 3'!A2) | [296.5](\\\\IHADTCSV\\Redirect$\\Teacher\\seino-ju\\Documents\\清野\\〓Table+1.2.3.4.5-2江夏1017修正.xlsx" \l "'Table 3'!A2) |  |  | [523.6](\\\\IHADTCSV\\Redirect$\\Teacher\\seino-ju\\Documents\\清野\\〓Table+1.2.3.4.5-2江夏1017修正.xlsx" \l "'Table 3'!A2) | [±](\\\\IHADTCSV\\Redirect$\\Teacher\\seino-ju\\Documents\\清野\\〓Table+1.2.3.4.5-2江夏1017修正.xlsx" \l "'Table 3'!A2) | [161.2](\\\\IHADTCSV\\Redirect$\\Teacher\\seino-ju\\Documents\\清野\\〓Table+1.2.3.4.5-2江夏1017修正.xlsx" \l "'Table 3'!A2) |  | [659.6](\\\\IHADTCSV\\Redirect$\\Teacher\\seino-ju\\Documents\\清野\\〓Table+1.2.3.4.5-2江夏1017修正.xlsx" \l "'Table 3'!A2) | [±](\\\\IHADTCSV\\Redirect$\\Teacher\\seino-ju\\Documents\\清野\\〓Table+1.2.3.4.5-2江夏1017修正.xlsx" \l "'Table 3'!A2) | [233.0](\\\\IHADTCSV\\Redirect$\\Teacher\\seino-ju\\Documents\\清野\\〓Table+1.2.3.4.5-2江夏1017修正.xlsx" \l "'Table 3'!A2) |  | [615.8](\\\\IHADTCSV\\Redirect$\\Teacher\\seino-ju\\Documents\\清野\\〓Table+1.2.3.4.5-2江夏1017修正.xlsx" \l "'Table 3'!A2) | [±](\\\\IHADTCSV\\Redirect$\\Teacher\\seino-ju\\Documents\\清野\\〓Table+1.2.3.4.5-2江夏1017修正.xlsx" \l "'Table 3'!A2) | [185.2](\\\\IHADTCSV\\Redirect$\\Teacher\\seino-ju\\Documents\\清野\\〓Table+1.2.3.4.5-2江夏1017修正.xlsx" \l "'Table 3'!A2) |  |  | [0.958](\\\\IHADTCSV\\Redirect$\\Teacher\\seino-ju\\Documents\\清野\\〓Table+1.2.3.4.5-2江夏1017修正.xlsx" \l "'Table 3'!A2) |  |
| [Iron (mg)](\\\\IHADTCSV\\Redirect$\\Teacher\\seino-ju\\Documents\\清野\\〓Table+1.2.3.4.5-2江夏1017修正.xlsx" \l "'Table 3'!A2) | [8.2](\\\\IHADTCSV\\Redirect$\\Teacher\\seino-ju\\Documents\\清野\\〓Table+1.2.3.4.5-2江夏1017修正.xlsx" \l "'Table 3'!A2) | [±](\\\\IHADTCSV\\Redirect$\\Teacher\\seino-ju\\Documents\\清野\\〓Table+1.2.3.4.5-2江夏1017修正.xlsx" \l "'Table 3'!A2) | [4.0](\\\\IHADTCSV\\Redirect$\\Teacher\\seino-ju\\Documents\\清野\\〓Table+1.2.3.4.5-2江夏1017修正.xlsx" \l "'Table 3'!A2) |  | [9.4](\\\\IHADTCSV\\Redirect$\\Teacher\\seino-ju\\Documents\\清野\\〓Table+1.2.3.4.5-2江夏1017修正.xlsx" \l "'Table 3'!A2) | [±](\\\\IHADTCSV\\Redirect$\\Teacher\\seino-ju\\Documents\\清野\\〓Table+1.2.3.4.5-2江夏1017修正.xlsx" \l "'Table 3'!A2) | [2.8](\\\\IHADTCSV\\Redirect$\\Teacher\\seino-ju\\Documents\\清野\\〓Table+1.2.3.4.5-2江夏1017修正.xlsx" \l "'Table 3'!A2) |  | [9.3](\\\\IHADTCSV\\Redirect$\\Teacher\\seino-ju\\Documents\\清野\\〓Table+1.2.3.4.5-2江夏1017修正.xlsx" \l "'Table 3'!A2) | [±](\\\\IHADTCSV\\Redirect$\\Teacher\\seino-ju\\Documents\\清野\\〓Table+1.2.3.4.5-2江夏1017修正.xlsx" \l "'Table 3'!A2) | [4.1](\\\\IHADTCSV\\Redirect$\\Teacher\\seino-ju\\Documents\\清野\\〓Table+1.2.3.4.5-2江夏1017修正.xlsx" \l "'Table 3'!A2) |  |  | [8.5](\\\\IHADTCSV\\Redirect$\\Teacher\\seino-ju\\Documents\\清野\\〓Table+1.2.3.4.5-2江夏1017修正.xlsx" \l "'Table 3'!A2) | [±](\\\\IHADTCSV\\Redirect$\\Teacher\\seino-ju\\Documents\\清野\\〓Table+1.2.3.4.5-2江夏1017修正.xlsx" \l "'Table 3'!A2) | [2.1](\\\\IHADTCSV\\Redirect$\\Teacher\\seino-ju\\Documents\\清野\\〓Table+1.2.3.4.5-2江夏1017修正.xlsx" \l "'Table 3'!A2) |  | [9.4](\\\\IHADTCSV\\Redirect$\\Teacher\\seino-ju\\Documents\\清野\\〓Table+1.2.3.4.5-2江夏1017修正.xlsx" \l "'Table 3'!A2) | [±](\\\\IHADTCSV\\Redirect$\\Teacher\\seino-ju\\Documents\\清野\\〓Table+1.2.3.4.5-2江夏1017修正.xlsx" \l "'Table 3'!A2) | [3.3](\\\\IHADTCSV\\Redirect$\\Teacher\\seino-ju\\Documents\\清野\\〓Table+1.2.3.4.5-2江夏1017修正.xlsx" \l "'Table 3'!A2) |  | [10.1](\\\\IHADTCSV\\Redirect$\\Teacher\\seino-ju\\Documents\\清野\\〓Table+1.2.3.4.5-2江夏1017修正.xlsx" \l "'Table 3'!A2) | [±](\\\\IHADTCSV\\Redirect$\\Teacher\\seino-ju\\Documents\\清野\\〓Table+1.2.3.4.5-2江夏1017修正.xlsx" \l "'Table 3'!A2) | [3.7](\\\\IHADTCSV\\Redirect$\\Teacher\\seino-ju\\Documents\\清野\\〓Table+1.2.3.4.5-2江夏1017修正.xlsx" \l "'Table 3'!A2) |  |  | [0.850](\\\\IHADTCSV\\Redirect$\\Teacher\\seino-ju\\Documents\\清野\\〓Table+1.2.3.4.5-2江夏1017修正.xlsx" \l "'Table 3'!A2) |  |
| [Vitamin D (μg)](\\\\IHADTCSV\\Redirect$\\Teacher\\seino-ju\\Documents\\清野\\〓Table+1.2.3.4.5-2江夏1017修正.xlsx" \l "'Table 3'!A2) | [8.4](\\\\IHADTCSV\\Redirect$\\Teacher\\seino-ju\\Documents\\清野\\〓Table+1.2.3.4.5-2江夏1017修正.xlsx" \l "'Table 3'!A2) | [±](\\\\IHADTCSV\\Redirect$\\Teacher\\seino-ju\\Documents\\清野\\〓Table+1.2.3.4.5-2江夏1017修正.xlsx" \l "'Table 3'!A2) | [4.4](\\\\IHADTCSV\\Redirect$\\Teacher\\seino-ju\\Documents\\清野\\〓Table+1.2.3.4.5-2江夏1017修正.xlsx" \l "'Table 3'!A2) |  | [9.2](\\\\IHADTCSV\\Redirect$\\Teacher\\seino-ju\\Documents\\清野\\〓Table+1.2.3.4.5-2江夏1017修正.xlsx" \l "'Table 3'!A2) | [±](\\\\IHADTCSV\\Redirect$\\Teacher\\seino-ju\\Documents\\清野\\〓Table+1.2.3.4.5-2江夏1017修正.xlsx" \l "'Table 3'!A2) | [6.0](\\\\IHADTCSV\\Redirect$\\Teacher\\seino-ju\\Documents\\清野\\〓Table+1.2.3.4.5-2江夏1017修正.xlsx" \l "'Table 3'!A2) |  | [10.2](\\\\IHADTCSV\\Redirect$\\Teacher\\seino-ju\\Documents\\清野\\〓Table+1.2.3.4.5-2江夏1017修正.xlsx" \l "'Table 3'!A2) | [±](\\\\IHADTCSV\\Redirect$\\Teacher\\seino-ju\\Documents\\清野\\〓Table+1.2.3.4.5-2江夏1017修正.xlsx" \l "'Table 3'!A2) | [6.1](\\\\IHADTCSV\\Redirect$\\Teacher\\seino-ju\\Documents\\清野\\〓Table+1.2.3.4.5-2江夏1017修正.xlsx" \l "'Table 3'!A2) |  |  | [7.5](\\\\IHADTCSV\\Redirect$\\Teacher\\seino-ju\\Documents\\清野\\〓Table+1.2.3.4.5-2江夏1017修正.xlsx" \l "'Table 3'!A2) | [±](\\\\IHADTCSV\\Redirect$\\Teacher\\seino-ju\\Documents\\清野\\〓Table+1.2.3.4.5-2江夏1017修正.xlsx" \l "'Table 3'!A2) | [5.2](\\\\IHADTCSV\\Redirect$\\Teacher\\seino-ju\\Documents\\清野\\〓Table+1.2.3.4.5-2江夏1017修正.xlsx" \l "'Table 3'!A2) |  | [8.1](\\\\IHADTCSV\\Redirect$\\Teacher\\seino-ju\\Documents\\清野\\〓Table+1.2.3.4.5-2江夏1017修正.xlsx" \l "'Table 3'!A2) | [±](\\\\IHADTCSV\\Redirect$\\Teacher\\seino-ju\\Documents\\清野\\〓Table+1.2.3.4.5-2江夏1017修正.xlsx" \l "'Table 3'!A2) | [4.7](\\\\IHADTCSV\\Redirect$\\Teacher\\seino-ju\\Documents\\清野\\〓Table+1.2.3.4.5-2江夏1017修正.xlsx" \l "'Table 3'!A2) |  | [13.3](\\\\IHADTCSV\\Redirect$\\Teacher\\seino-ju\\Documents\\清野\\〓Table+1.2.3.4.5-2江夏1017修正.xlsx" \l "'Table 3'!A2) | [±](\\\\IHADTCSV\\Redirect$\\Teacher\\seino-ju\\Documents\\清野\\〓Table+1.2.3.4.5-2江夏1017修正.xlsx" \l "'Table 3'!A2) | [11.3](\\\\IHADTCSV\\Redirect$\\Teacher\\seino-ju\\Documents\\清野\\〓Table+1.2.3.4.5-2江夏1017修正.xlsx" \l "'Table 3'!A2) |  |  | [0.597](\\\\IHADTCSV\\Redirect$\\Teacher\\seino-ju\\Documents\\清野\\〓Table+1.2.3.4.5-2江夏1017修正.xlsx" \l "'Table 3'!A2) |  |
| [Vitamin B](\\\\IHADTCSV\\Redirect$\\Teacher\\seino-ju\\Documents\\清野\\〓Table+1.2.3.4.5-2江夏1017修正.xlsx" \l "'Table 3'!A2)[1](\\\\IHADTCSV\\Redirect$\\Teacher\\seino-ju\\Documents\\清野\\〓Table+1.2.3.4.5-2江夏1017修正.xlsx" \l "'Table 3'!A2) [(mg)](\\\\IHADTCSV\\Redirect$\\Teacher\\seino-ju\\Documents\\清野\\〓Table+1.2.3.4.5-2江夏1017修正.xlsx" \l "'Table 3'!A2) | [0.9](\\\\IHADTCSV\\Redirect$\\Teacher\\seino-ju\\Documents\\清野\\〓Table+1.2.3.4.5-2江夏1017修正.xlsx" \l "'Table 3'!A2) | [±](\\\\IHADTCSV\\Redirect$\\Teacher\\seino-ju\\Documents\\清野\\〓Table+1.2.3.4.5-2江夏1017修正.xlsx" \l "'Table 3'!A2) | [0.4](\\\\IHADTCSV\\Redirect$\\Teacher\\seino-ju\\Documents\\清野\\〓Table+1.2.3.4.5-2江夏1017修正.xlsx" \l "'Table 3'!A2) |  | [1.1](\\\\IHADTCSV\\Redirect$\\Teacher\\seino-ju\\Documents\\清野\\〓Table+1.2.3.4.5-2江夏1017修正.xlsx" \l "'Table 3'!A2) | [±](\\\\IHADTCSV\\Redirect$\\Teacher\\seino-ju\\Documents\\清野\\〓Table+1.2.3.4.5-2江夏1017修正.xlsx" \l "'Table 3'!A2) | [0.2](\\\\IHADTCSV\\Redirect$\\Teacher\\seino-ju\\Documents\\清野\\〓Table+1.2.3.4.5-2江夏1017修正.xlsx" \l "'Table 3'!A2) |  | [1.1](\\\\IHADTCSV\\Redirect$\\Teacher\\seino-ju\\Documents\\清野\\〓Table+1.2.3.4.5-2江夏1017修正.xlsx" \l "'Table 3'!A2) | [±](\\\\IHADTCSV\\Redirect$\\Teacher\\seino-ju\\Documents\\清野\\〓Table+1.2.3.4.5-2江夏1017修正.xlsx" \l "'Table 3'!A2) | [0.3](\\\\IHADTCSV\\Redirect$\\Teacher\\seino-ju\\Documents\\清野\\〓Table+1.2.3.4.5-2江夏1017修正.xlsx" \l "'Table 3'!A2) |  |  | [1.0](\\\\IHADTCSV\\Redirect$\\Teacher\\seino-ju\\Documents\\清野\\〓Table+1.2.3.4.5-2江夏1017修正.xlsx" \l "'Table 3'!A2) | [±](\\\\IHADTCSV\\Redirect$\\Teacher\\seino-ju\\Documents\\清野\\〓Table+1.2.3.4.5-2江夏1017修正.xlsx" \l "'Table 3'!A2) | [0.3](\\\\IHADTCSV\\Redirect$\\Teacher\\seino-ju\\Documents\\清野\\〓Table+1.2.3.4.5-2江夏1017修正.xlsx" \l "'Table 3'!A2) |  | [1.1](\\\\IHADTCSV\\Redirect$\\Teacher\\seino-ju\\Documents\\清野\\〓Table+1.2.3.4.5-2江夏1017修正.xlsx" \l "'Table 3'!A2) | [±](\\\\IHADTCSV\\Redirect$\\Teacher\\seino-ju\\Documents\\清野\\〓Table+1.2.3.4.5-2江夏1017修正.xlsx" \l "'Table 3'!A2) | [0.4](\\\\IHADTCSV\\Redirect$\\Teacher\\seino-ju\\Documents\\清野\\〓Table+1.2.3.4.5-2江夏1017修正.xlsx" \l "'Table 3'!A2) |  | [1.2](\\\\IHADTCSV\\Redirect$\\Teacher\\seino-ju\\Documents\\清野\\〓Table+1.2.3.4.5-2江夏1017修正.xlsx" \l "'Table 3'!A2) | [±](\\\\IHADTCSV\\Redirect$\\Teacher\\seino-ju\\Documents\\清野\\〓Table+1.2.3.4.5-2江夏1017修正.xlsx" \l "'Table 3'!A2) | [0.4](\\\\IHADTCSV\\Redirect$\\Teacher\\seino-ju\\Documents\\清野\\〓Table+1.2.3.4.5-2江夏1017修正.xlsx" \l "'Table 3'!A2) |  |  | [0.455](\\\\IHADTCSV\\Redirect$\\Teacher\\seino-ju\\Documents\\清野\\〓Table+1.2.3.4.5-2江夏1017修正.xlsx" \l "'Table 3'!A2) |  |
| [Vitamin C (mg)](\\\\IHADTCSV\\Redirect$\\Teacher\\seino-ju\\Documents\\清野\\〓Table+1.2.3.4.5-2江夏1017修正.xlsx" \l "'Table 3'!A2) | [115.9](\\\\IHADTCSV\\Redirect$\\Teacher\\seino-ju\\Documents\\清野\\〓Table+1.2.3.4.5-2江夏1017修正.xlsx" \l "'Table 3'!A2) | [±](\\\\IHADTCSV\\Redirect$\\Teacher\\seino-ju\\Documents\\清野\\〓Table+1.2.3.4.5-2江夏1017修正.xlsx" \l "'Table 3'!A2) | [54.8](\\\\IHADTCSV\\Redirect$\\Teacher\\seino-ju\\Documents\\清野\\〓Table+1.2.3.4.5-2江夏1017修正.xlsx" \l "'Table 3'!A2) |  | [141.7](\\\\IHADTCSV\\Redirect$\\Teacher\\seino-ju\\Documents\\清野\\〓Table+1.2.3.4.5-2江夏1017修正.xlsx" \l "'Table 3'!A2) | [±](\\\\IHADTCSV\\Redirect$\\Teacher\\seino-ju\\Documents\\清野\\〓Table+1.2.3.4.5-2江夏1017修正.xlsx" \l "'Table 3'!A2) | [59.4](\\\\IHADTCSV\\Redirect$\\Teacher\\seino-ju\\Documents\\清野\\〓Table+1.2.3.4.5-2江夏1017修正.xlsx" \l "'Table 3'!A2) |  | [132.1](\\\\IHADTCSV\\Redirect$\\Teacher\\seino-ju\\Documents\\清野\\〓Table+1.2.3.4.5-2江夏1017修正.xlsx" \l "'Table 3'!A2) | [±](\\\\IHADTCSV\\Redirect$\\Teacher\\seino-ju\\Documents\\清野\\〓Table+1.2.3.4.5-2江夏1017修正.xlsx" \l "'Table 3'!A2) | [74.0](\\\\IHADTCSV\\Redirect$\\Teacher\\seino-ju\\Documents\\清野\\〓Table+1.2.3.4.5-2江夏1017修正.xlsx" \l "'Table 3'!A2) |  |  | [102.5](\\\\IHADTCSV\\Redirect$\\Teacher\\seino-ju\\Documents\\清野\\〓Table+1.2.3.4.5-2江夏1017修正.xlsx" \l "'Table 3'!A2) | [±](\\\\IHADTCSV\\Redirect$\\Teacher\\seino-ju\\Documents\\清野\\〓Table+1.2.3.4.5-2江夏1017修正.xlsx" \l "'Table 3'!A2) | [47.2](\\\\IHADTCSV\\Redirect$\\Teacher\\seino-ju\\Documents\\清野\\〓Table+1.2.3.4.5-2江夏1017修正.xlsx" \l "'Table 3'!A2) |  | [131.8](\\\\IHADTCSV\\Redirect$\\Teacher\\seino-ju\\Documents\\清野\\〓Table+1.2.3.4.5-2江夏1017修正.xlsx" \l "'Table 3'!A2) | [±](\\\\IHADTCSV\\Redirect$\\Teacher\\seino-ju\\Documents\\清野\\〓Table+1.2.3.4.5-2江夏1017修正.xlsx" \l "'Table 3'!A2) | [79.2](\\\\IHADTCSV\\Redirect$\\Teacher\\seino-ju\\Documents\\清野\\〓Table+1.2.3.4.5-2江夏1017修正.xlsx" \l "'Table 3'!A2) |  | [131.3](\\\\IHADTCSV\\Redirect$\\Teacher\\seino-ju\\Documents\\清野\\〓Table+1.2.3.4.5-2江夏1017修正.xlsx" \l "'Table 3'!A2) | [±](\\\\IHADTCSV\\Redirect$\\Teacher\\seino-ju\\Documents\\清野\\〓Table+1.2.3.4.5-2江夏1017修正.xlsx" \l "'Table 3'!A2) | [65.4](\\\\IHADTCSV\\Redirect$\\Teacher\\seino-ju\\Documents\\清野\\〓Table+1.2.3.4.5-2江夏1017修正.xlsx" \l "'Table 3'!A2) |  |  | [0.469](\\\\IHADTCSV\\Redirect$\\Teacher\\seino-ju\\Documents\\清野\\〓Table+1.2.3.4.5-2江夏1017修正.xlsx" \l "'Table 3'!A2) |  |
| [Dietary fiber (g)](\\\\IHADTCSV\\Redirect$\\Teacher\\seino-ju\\Documents\\清野\\〓Table+1.2.3.4.5-2江夏1017修正.xlsx" \l "'Table 3'!A2) | [12.3](\\\\IHADTCSV\\Redirect$\\Teacher\\seino-ju\\Documents\\清野\\〓Table+1.2.3.4.5-2江夏1017修正.xlsx" \l "'Table 3'!A2) | [±](\\\\IHADTCSV\\Redirect$\\Teacher\\seino-ju\\Documents\\清野\\〓Table+1.2.3.4.5-2江夏1017修正.xlsx" \l "'Table 3'!A2) | [5.4](\\\\IHADTCSV\\Redirect$\\Teacher\\seino-ju\\Documents\\清野\\〓Table+1.2.3.4.5-2江夏1017修正.xlsx" \l "'Table 3'!A2) |  | [13.6](\\\\IHADTCSV\\Redirect$\\Teacher\\seino-ju\\Documents\\清野\\〓Table+1.2.3.4.5-2江夏1017修正.xlsx" \l "'Table 3'!A2) | [±](\\\\IHADTCSV\\Redirect$\\Teacher\\seino-ju\\Documents\\清野\\〓Table+1.2.3.4.5-2江夏1017修正.xlsx" \l "'Table 3'!A2) | [4.1](\\\\IHADTCSV\\Redirect$\\Teacher\\seino-ju\\Documents\\清野\\〓Table+1.2.3.4.5-2江夏1017修正.xlsx" \l "'Table 3'!A2) |  | [13.8](\\\\IHADTCSV\\Redirect$\\Teacher\\seino-ju\\Documents\\清野\\〓Table+1.2.3.4.5-2江夏1017修正.xlsx" \l "'Table 3'!A2) | [±](\\\\IHADTCSV\\Redirect$\\Teacher\\seino-ju\\Documents\\清野\\〓Table+1.2.3.4.5-2江夏1017修正.xlsx" \l "'Table 3'!A2) | [4.9](\\\\IHADTCSV\\Redirect$\\Teacher\\seino-ju\\Documents\\清野\\〓Table+1.2.3.4.5-2江夏1017修正.xlsx" \l "'Table 3'!A2) |  |  | [13.5](\\\\IHADTCSV\\Redirect$\\Teacher\\seino-ju\\Documents\\清野\\〓Table+1.2.3.4.5-2江夏1017修正.xlsx" \l "'Table 3'!A2) | [±](\\\\IHADTCSV\\Redirect$\\Teacher\\seino-ju\\Documents\\清野\\〓Table+1.2.3.4.5-2江夏1017修正.xlsx" \l "'Table 3'!A2) | [3.7](\\\\IHADTCSV\\Redirect$\\Teacher\\seino-ju\\Documents\\清野\\〓Table+1.2.3.4.5-2江夏1017修正.xlsx" \l "'Table 3'!A2) |  | [14.4](\\\\IHADTCSV\\Redirect$\\Teacher\\seino-ju\\Documents\\清野\\〓Table+1.2.3.4.5-2江夏1017修正.xlsx" \l "'Table 3'!A2) | [±](\\\\IHADTCSV\\Redirect$\\Teacher\\seino-ju\\Documents\\清野\\〓Table+1.2.3.4.5-2江夏1017修正.xlsx" \l "'Table 3'!A2) | [5.4](\\\\IHADTCSV\\Redirect$\\Teacher\\seino-ju\\Documents\\清野\\〓Table+1.2.3.4.5-2江夏1017修正.xlsx" \l "'Table 3'!A2) |  | [14.8](\\\\IHADTCSV\\Redirect$\\Teacher\\seino-ju\\Documents\\清野\\〓Table+1.2.3.4.5-2江夏1017修正.xlsx" \l "'Table 3'!A2) | [±](\\\\IHADTCSV\\Redirect$\\Teacher\\seino-ju\\Documents\\清野\\〓Table+1.2.3.4.5-2江夏1017修正.xlsx" \l "'Table 3'!A2) | [5.3](\\\\IHADTCSV\\Redirect$\\Teacher\\seino-ju\\Documents\\清野\\〓Table+1.2.3.4.5-2江夏1017修正.xlsx" \l "'Table 3'!A2) |  |  | [0.461](\\\\IHADTCSV\\Redirect$\\Teacher\\seino-ju\\Documents\\清野\\〓Table+1.2.3.4.5-2江夏1017修正.xlsx" \l "'Table 3'!A2) |  |
| **[BDHQ（Intake by food group）](\\\\IHADTCSV\\Redirect$\\Teacher\\seino-ju\\Documents\\清野\\〓Table+1.2.3.4.5-2江夏1017修正.xlsx" \l "'Table 3'!A2)** | |  |  |  |  |  |  |  |  |  |  |  |  |  |  |  |  |  |  |  |  |  |  |  |  |  |  |  |  |
|  | [Cereals (g)](\\\\IHADTCSV\\Redirect$\\Teacher\\seino-ju\\Documents\\清野\\〓Table+1.2.3.4.5-2江夏1017修正.xlsx" \l "'Table 3'!A2) | [955.3](\\\\IHADTCSV\\Redirect$\\Teacher\\seino-ju\\Documents\\清野\\〓Table+1.2.3.4.5-2江夏1017修正.xlsx" \l "'Table 3'!A2) | [±](\\\\IHADTCSV\\Redirect$\\Teacher\\seino-ju\\Documents\\清野\\〓Table+1.2.3.4.5-2江夏1017修正.xlsx" \l "'Table 3'!A2) | [305.6](\\\\IHADTCSV\\Redirect$\\Teacher\\seino-ju\\Documents\\清野\\〓Table+1.2.3.4.5-2江夏1017修正.xlsx" \l "'Table 3'!A2) |  | [1099.6](\\\\IHADTCSV\\Redirect$\\Teacher\\seino-ju\\Documents\\清野\\〓Table+1.2.3.4.5-2江夏1017修正.xlsx" \l "'Table 3'!A2) | [±](\\\\IHADTCSV\\Redirect$\\Teacher\\seino-ju\\Documents\\清野\\〓Table+1.2.3.4.5-2江夏1017修正.xlsx" \l "'Table 3'!A2) | [245.1](\\\\IHADTCSV\\Redirect$\\Teacher\\seino-ju\\Documents\\清野\\〓Table+1.2.3.4.5-2江夏1017修正.xlsx" \l "'Table 3'!A2) |  | [1193.5](\\\\IHADTCSV\\Redirect$\\Teacher\\seino-ju\\Documents\\清野\\〓Table+1.2.3.4.5-2江夏1017修正.xlsx" \l "'Table 3'!A2) | [±](\\\\IHADTCSV\\Redirect$\\Teacher\\seino-ju\\Documents\\清野\\〓Table+1.2.3.4.5-2江夏1017修正.xlsx" \l "'Table 3'!A2) | [268.2](\\\\IHADTCSV\\Redirect$\\Teacher\\seino-ju\\Documents\\清野\\〓Table+1.2.3.4.5-2江夏1017修正.xlsx" \l "'Table 3'!A2) |  |  | [1020.1](\\\\IHADTCSV\\Redirect$\\Teacher\\seino-ju\\Documents\\清野\\〓Table+1.2.3.4.5-2江夏1017修正.xlsx" \l "'Table 3'!A2) | [±](\\\\IHADTCSV\\Redirect$\\Teacher\\seino-ju\\Documents\\清野\\〓Table+1.2.3.4.5-2江夏1017修正.xlsx" \l "'Table 3'!A2) | [327.9](\\\\IHADTCSV\\Redirect$\\Teacher\\seino-ju\\Documents\\清野\\〓Table+1.2.3.4.5-2江夏1017修正.xlsx" \l "'Table 3'!A2) |  | [1022.3](\\\\IHADTCSV\\Redirect$\\Teacher\\seino-ju\\Documents\\清野\\〓Table+1.2.3.4.5-2江夏1017修正.xlsx" \l "'Table 3'!A2) | [±](\\\\IHADTCSV\\Redirect$\\Teacher\\seino-ju\\Documents\\清野\\〓Table+1.2.3.4.5-2江夏1017修正.xlsx" \l "'Table 3'!A2) | [207.5](\\\\IHADTCSV\\Redirect$\\Teacher\\seino-ju\\Documents\\清野\\〓Table+1.2.3.4.5-2江夏1017修正.xlsx" \l "'Table 3'!A2) |  | [1074.9](\\\\IHADTCSV\\Redirect$\\Teacher\\seino-ju\\Documents\\清野\\〓Table+1.2.3.4.5-2江夏1017修正.xlsx" \l "'Table 3'!A2) | [±](\\\\IHADTCSV\\Redirect$\\Teacher\\seino-ju\\Documents\\清野\\〓Table+1.2.3.4.5-2江夏1017修正.xlsx" \l "'Table 3'!A2) | [285.0](\\\\IHADTCSV\\Redirect$\\Teacher\\seino-ju\\Documents\\清野\\〓Table+1.2.3.4.5-2江夏1017修正.xlsx" \l "'Table 3'!A2) |  |  | [0.577](\\\\IHADTCSV\\Redirect$\\Teacher\\seino-ju\\Documents\\清野\\〓Table+1.2.3.4.5-2江夏1017修正.xlsx" \l "'Table 3'!A2) |  |
|  | [Potatoes (g)](\\\\IHADTCSV\\Redirect$\\Teacher\\seino-ju\\Documents\\清野\\〓Table+1.2.3.4.5-2江夏1017修正.xlsx" \l "'Table 3'!A2) | [25.8](\\\\IHADTCSV\\Redirect$\\Teacher\\seino-ju\\Documents\\清野\\〓Table+1.2.3.4.5-2江夏1017修正.xlsx" \l "'Table 3'!A2) | [±](\\\\IHADTCSV\\Redirect$\\Teacher\\seino-ju\\Documents\\清野\\〓Table+1.2.3.4.5-2江夏1017修正.xlsx" \l "'Table 3'!A2) | [25.1](\\\\IHADTCSV\\Redirect$\\Teacher\\seino-ju\\Documents\\清野\\〓Table+1.2.3.4.5-2江夏1017修正.xlsx" \l "'Table 3'!A2) |  | [26.2](\\\\IHADTCSV\\Redirect$\\Teacher\\seino-ju\\Documents\\清野\\〓Table+1.2.3.4.5-2江夏1017修正.xlsx" \l "'Table 3'!A2) | [±](\\\\IHADTCSV\\Redirect$\\Teacher\\seino-ju\\Documents\\清野\\〓Table+1.2.3.4.5-2江夏1017修正.xlsx" \l "'Table 3'!A2) | [38.8](\\\\IHADTCSV\\Redirect$\\Teacher\\seino-ju\\Documents\\清野\\〓Table+1.2.3.4.5-2江夏1017修正.xlsx" \l "'Table 3'!A2) |  | [28.9](\\\\IHADTCSV\\Redirect$\\Teacher\\seino-ju\\Documents\\清野\\〓Table+1.2.3.4.5-2江夏1017修正.xlsx" \l "'Table 3'!A2) | [±](\\\\IHADTCSV\\Redirect$\\Teacher\\seino-ju\\Documents\\清野\\〓Table+1.2.3.4.5-2江夏1017修正.xlsx" \l "'Table 3'!A2) | [22.5](\\\\IHADTCSV\\Redirect$\\Teacher\\seino-ju\\Documents\\清野\\〓Table+1.2.3.4.5-2江夏1017修正.xlsx" \l "'Table 3'!A2) |  |  | [31.3](\\\\IHADTCSV\\Redirect$\\Teacher\\seino-ju\\Documents\\清野\\〓Table+1.2.3.4.5-2江夏1017修正.xlsx" \l "'Table 3'!A2) | [±](\\\\IHADTCSV\\Redirect$\\Teacher\\seino-ju\\Documents\\清野\\〓Table+1.2.3.4.5-2江夏1017修正.xlsx" \l "'Table 3'!A2) | [32.8](\\\\IHADTCSV\\Redirect$\\Teacher\\seino-ju\\Documents\\清野\\〓Table+1.2.3.4.5-2江夏1017修正.xlsx" \l "'Table 3'!A2) |  | [30.8](\\\\IHADTCSV\\Redirect$\\Teacher\\seino-ju\\Documents\\清野\\〓Table+1.2.3.4.5-2江夏1017修正.xlsx" \l "'Table 3'!A2) | [±](\\\\IHADTCSV\\Redirect$\\Teacher\\seino-ju\\Documents\\清野\\〓Table+1.2.3.4.5-2江夏1017修正.xlsx" \l "'Table 3'!A2) | [32.0](\\\\IHADTCSV\\Redirect$\\Teacher\\seino-ju\\Documents\\清野\\〓Table+1.2.3.4.5-2江夏1017修正.xlsx" \l "'Table 3'!A2) |  | [42.5](\\\\IHADTCSV\\Redirect$\\Teacher\\seino-ju\\Documents\\清野\\〓Table+1.2.3.4.5-2江夏1017修正.xlsx" \l "'Table 3'!A2) | [±](\\\\IHADTCSV\\Redirect$\\Teacher\\seino-ju\\Documents\\清野\\〓Table+1.2.3.4.5-2江夏1017修正.xlsx" \l "'Table 3'!A2) | [42.4](\\\\IHADTCSV\\Redirect$\\Teacher\\seino-ju\\Documents\\清野\\〓Table+1.2.3.4.5-2江夏1017修正.xlsx" \l "'Table 3'!A2) |  |  | [0.610](\\\\IHADTCSV\\Redirect$\\Teacher\\seino-ju\\Documents\\清野\\〓Table+1.2.3.4.5-2江夏1017修正.xlsx" \l "'Table 3'!A2) |  |
|  | [Sugar and sweeteners (g)](\\\\IHADTCSV\\Redirect$\\Teacher\\seino-ju\\Documents\\清野\\〓Table+1.2.3.4.5-2江夏1017修正.xlsx" \l "'Table 3'!A2) | [2.7](\\\\IHADTCSV\\Redirect$\\Teacher\\seino-ju\\Documents\\清野\\〓Table+1.2.3.4.5-2江夏1017修正.xlsx" \l "'Table 3'!A2) | [±](\\\\IHADTCSV\\Redirect$\\Teacher\\seino-ju\\Documents\\清野\\〓Table+1.2.3.4.5-2江夏1017修正.xlsx" \l "'Table 3'!A2) | [2.5](\\\\IHADTCSV\\Redirect$\\Teacher\\seino-ju\\Documents\\清野\\〓Table+1.2.3.4.5-2江夏1017修正.xlsx" \l "'Table 3'!A2) |  | [2.9](\\\\IHADTCSV\\Redirect$\\Teacher\\seino-ju\\Documents\\清野\\〓Table+1.2.3.4.5-2江夏1017修正.xlsx" \l "'Table 3'!A2) | [±](\\\\IHADTCSV\\Redirect$\\Teacher\\seino-ju\\Documents\\清野\\〓Table+1.2.3.4.5-2江夏1017修正.xlsx" \l "'Table 3'!A2) | [2.7](\\\\IHADTCSV\\Redirect$\\Teacher\\seino-ju\\Documents\\清野\\〓Table+1.2.3.4.5-2江夏1017修正.xlsx" \l "'Table 3'!A2) |  | [3.6](\\\\IHADTCSV\\Redirect$\\Teacher\\seino-ju\\Documents\\清野\\〓Table+1.2.3.4.5-2江夏1017修正.xlsx" \l "'Table 3'!A2) | [±](\\\\IHADTCSV\\Redirect$\\Teacher\\seino-ju\\Documents\\清野\\〓Table+1.2.3.4.5-2江夏1017修正.xlsx" \l "'Table 3'!A2) | [2.1](\\\\IHADTCSV\\Redirect$\\Teacher\\seino-ju\\Documents\\清野\\〓Table+1.2.3.4.5-2江夏1017修正.xlsx" \l "'Table 3'!A2) |  |  | [2.5](\\\\IHADTCSV\\Redirect$\\Teacher\\seino-ju\\Documents\\清野\\〓Table+1.2.3.4.5-2江夏1017修正.xlsx" \l "'Table 3'!A2) | [±](\\\\IHADTCSV\\Redirect$\\Teacher\\seino-ju\\Documents\\清野\\〓Table+1.2.3.4.5-2江夏1017修正.xlsx" \l "'Table 3'!A2) | [2.0](\\\\IHADTCSV\\Redirect$\\Teacher\\seino-ju\\Documents\\清野\\〓Table+1.2.3.4.5-2江夏1017修正.xlsx" \l "'Table 3'!A2) |  | [2.3](\\\\IHADTCSV\\Redirect$\\Teacher\\seino-ju\\Documents\\清野\\〓Table+1.2.3.4.5-2江夏1017修正.xlsx" \l "'Table 3'!A2) | [±](\\\\IHADTCSV\\Redirect$\\Teacher\\seino-ju\\Documents\\清野\\〓Table+1.2.3.4.5-2江夏1017修正.xlsx" \l "'Table 3'!A2) | [1.6](\\\\IHADTCSV\\Redirect$\\Teacher\\seino-ju\\Documents\\清野\\〓Table+1.2.3.4.5-2江夏1017修正.xlsx" \l "'Table 3'!A2) |  | [3.4](\\\\IHADTCSV\\Redirect$\\Teacher\\seino-ju\\Documents\\清野\\〓Table+1.2.3.4.5-2江夏1017修正.xlsx" \l "'Table 3'!A2) | [±](\\\\IHADTCSV\\Redirect$\\Teacher\\seino-ju\\Documents\\清野\\〓Table+1.2.3.4.5-2江夏1017修正.xlsx" \l "'Table 3'!A2) | [1.9](\\\\IHADTCSV\\Redirect$\\Teacher\\seino-ju\\Documents\\清野\\〓Table+1.2.3.4.5-2江夏1017修正.xlsx" \l "'Table 3'!A2) |  |  | [0.861](\\\\IHADTCSV\\Redirect$\\Teacher\\seino-ju\\Documents\\清野\\〓Table+1.2.3.4.5-2江夏1017修正.xlsx" \l "'Table 3'!A2) |  |
|  | [Pulses (g)](\\\\IHADTCSV\\Redirect$\\Teacher\\seino-ju\\Documents\\清野\\〓Table+1.2.3.4.5-2江夏1017修正.xlsx" \l "'Table 3'!A2) | [67.4](\\\\IHADTCSV\\Redirect$\\Teacher\\seino-ju\\Documents\\清野\\〓Table+1.2.3.4.5-2江夏1017修正.xlsx" \l "'Table 3'!A2) | [±](\\\\IHADTCSV\\Redirect$\\Teacher\\seino-ju\\Documents\\清野\\〓Table+1.2.3.4.5-2江夏1017修正.xlsx" \l "'Table 3'!A2) | [67.1](\\\\IHADTCSV\\Redirect$\\Teacher\\seino-ju\\Documents\\清野\\〓Table+1.2.3.4.5-2江夏1017修正.xlsx" \l "'Table 3'!A2) |  | [76.4](\\\\IHADTCSV\\Redirect$\\Teacher\\seino-ju\\Documents\\清野\\〓Table+1.2.3.4.5-2江夏1017修正.xlsx" \l "'Table 3'!A2) | [±](\\\\IHADTCSV\\Redirect$\\Teacher\\seino-ju\\Documents\\清野\\〓Table+1.2.3.4.5-2江夏1017修正.xlsx" \l "'Table 3'!A2) | [72.8](\\\\IHADTCSV\\Redirect$\\Teacher\\seino-ju\\Documents\\清野\\〓Table+1.2.3.4.5-2江夏1017修正.xlsx" \l "'Table 3'!A2) |  | [53.0](\\\\IHADTCSV\\Redirect$\\Teacher\\seino-ju\\Documents\\清野\\〓Table+1.2.3.4.5-2江夏1017修正.xlsx" \l "'Table 3'!A2) | [±](\\\\IHADTCSV\\Redirect$\\Teacher\\seino-ju\\Documents\\清野\\〓Table+1.2.3.4.5-2江夏1017修正.xlsx" \l "'Table 3'!A2) | [56.9](\\\\IHADTCSV\\Redirect$\\Teacher\\seino-ju\\Documents\\清野\\〓Table+1.2.3.4.5-2江夏1017修正.xlsx" \l "'Table 3'!A2) |  |  | [46.6](\\\\IHADTCSV\\Redirect$\\Teacher\\seino-ju\\Documents\\清野\\〓Table+1.2.3.4.5-2江夏1017修正.xlsx" \l "'Table 3'!A2) | [±](\\\\IHADTCSV\\Redirect$\\Teacher\\seino-ju\\Documents\\清野\\〓Table+1.2.3.4.5-2江夏1017修正.xlsx" \l "'Table 3'!A2) | [34.2](\\\\IHADTCSV\\Redirect$\\Teacher\\seino-ju\\Documents\\清野\\〓Table+1.2.3.4.5-2江夏1017修正.xlsx" \l "'Table 3'!A2) |  | [62.5](\\\\IHADTCSV\\Redirect$\\Teacher\\seino-ju\\Documents\\清野\\〓Table+1.2.3.4.5-2江夏1017修正.xlsx" \l "'Table 3'!A2) | [±](\\\\IHADTCSV\\Redirect$\\Teacher\\seino-ju\\Documents\\清野\\〓Table+1.2.3.4.5-2江夏1017修正.xlsx" \l "'Table 3'!A2) | [42.5](\\\\IHADTCSV\\Redirect$\\Teacher\\seino-ju\\Documents\\清野\\〓Table+1.2.3.4.5-2江夏1017修正.xlsx" \l "'Table 3'!A2) |  | [52.5](\\\\IHADTCSV\\Redirect$\\Teacher\\seino-ju\\Documents\\清野\\〓Table+1.2.3.4.5-2江夏1017修正.xlsx" \l "'Table 3'!A2) | [±](\\\\IHADTCSV\\Redirect$\\Teacher\\seino-ju\\Documents\\清野\\〓Table+1.2.3.4.5-2江夏1017修正.xlsx" \l "'Table 3'!A2) | [30.5](\\\\IHADTCSV\\Redirect$\\Teacher\\seino-ju\\Documents\\清野\\〓Table+1.2.3.4.5-2江夏1017修正.xlsx" \l "'Table 3'!A2) |  |  | [0.305](\\\\IHADTCSV\\Redirect$\\Teacher\\seino-ju\\Documents\\清野\\〓Table+1.2.3.4.5-2江夏1017修正.xlsx" \l "'Table 3'!A2) |  |
|  | [Green and yellow vegetables (g)](\\\\IHADTCSV\\Redirect$\\Teacher\\seino-ju\\Documents\\清野\\〓Table+1.2.3.4.5-2江夏1017修正.xlsx" \l "'Table 3'!A2) | [126.7](\\\\IHADTCSV\\Redirect$\\Teacher\\seino-ju\\Documents\\清野\\〓Table+1.2.3.4.5-2江夏1017修正.xlsx" \l "'Table 3'!A2) | [±](\\\\IHADTCSV\\Redirect$\\Teacher\\seino-ju\\Documents\\清野\\〓Table+1.2.3.4.5-2江夏1017修正.xlsx" \l "'Table 3'!A2) | [70.6](\\\\IHADTCSV\\Redirect$\\Teacher\\seino-ju\\Documents\\清野\\〓Table+1.2.3.4.5-2江夏1017修正.xlsx" \l "'Table 3'!A2) |  | [159.1](\\\\IHADTCSV\\Redirect$\\Teacher\\seino-ju\\Documents\\清野\\〓Table+1.2.3.4.5-2江夏1017修正.xlsx" \l "'Table 3'!A2) | [±](\\\\IHADTCSV\\Redirect$\\Teacher\\seino-ju\\Documents\\清野\\〓Table+1.2.3.4.5-2江夏1017修正.xlsx" \l "'Table 3'!A2) | [74.2](\\\\IHADTCSV\\Redirect$\\Teacher\\seino-ju\\Documents\\清野\\〓Table+1.2.3.4.5-2江夏1017修正.xlsx" \l "'Table 3'!A2) |  | [138.0](\\\\IHADTCSV\\Redirect$\\Teacher\\seino-ju\\Documents\\清野\\〓Table+1.2.3.4.5-2江夏1017修正.xlsx" \l "'Table 3'!A2) | [±](\\\\IHADTCSV\\Redirect$\\Teacher\\seino-ju\\Documents\\清野\\〓Table+1.2.3.4.5-2江夏1017修正.xlsx" \l "'Table 3'!A2) | [81.8](\\\\IHADTCSV\\Redirect$\\Teacher\\seino-ju\\Documents\\清野\\〓Table+1.2.3.4.5-2江夏1017修正.xlsx" \l "'Table 3'!A2) |  |  | [99.8](\\\\IHADTCSV\\Redirect$\\Teacher\\seino-ju\\Documents\\清野\\〓Table+1.2.3.4.5-2江夏1017修正.xlsx" \l "'Table 3'!A2) | [±](\\\\IHADTCSV\\Redirect$\\Teacher\\seino-ju\\Documents\\清野\\〓Table+1.2.3.4.5-2江夏1017修正.xlsx" \l "'Table 3'!A2) | [69.2](\\\\IHADTCSV\\Redirect$\\Teacher\\seino-ju\\Documents\\清野\\〓Table+1.2.3.4.5-2江夏1017修正.xlsx" \l "'Table 3'!A2) |  | [159.9](\\\\IHADTCSV\\Redirect$\\Teacher\\seino-ju\\Documents\\清野\\〓Table+1.2.3.4.5-2江夏1017修正.xlsx" \l "'Table 3'!A2) | [±](\\\\IHADTCSV\\Redirect$\\Teacher\\seino-ju\\Documents\\清野\\〓Table+1.2.3.4.5-2江夏1017修正.xlsx" \l "'Table 3'!A2) | [99.3](\\\\IHADTCSV\\Redirect$\\Teacher\\seino-ju\\Documents\\清野\\〓Table+1.2.3.4.5-2江夏1017修正.xlsx" \l "'Table 3'!A2) |  | [146.6](\\\\IHADTCSV\\Redirect$\\Teacher\\seino-ju\\Documents\\清野\\〓Table+1.2.3.4.5-2江夏1017修正.xlsx" \l "'Table 3'!A2) | [±](\\\\IHADTCSV\\Redirect$\\Teacher\\seino-ju\\Documents\\清野\\〓Table+1.2.3.4.5-2江夏1017修正.xlsx" \l "'Table 3'!A2) | [83.6](\\\\IHADTCSV\\Redirect$\\Teacher\\seino-ju\\Documents\\清野\\〓Table+1.2.3.4.5-2江夏1017修正.xlsx" \l "'Table 3'!A2) |  |  | [0.295](\\\\IHADTCSV\\Redirect$\\Teacher\\seino-ju\\Documents\\清野\\〓Table+1.2.3.4.5-2江夏1017修正.xlsx" \l "'Table 3'!A2) |  |
|  | [Other vegetables (g)](\\\\IHADTCSV\\Redirect$\\Teacher\\seino-ju\\Documents\\清野\\〓Table+1.2.3.4.5-2江夏1017修正.xlsx" \l "'Table 3'!A2) | [125.0](\\\\IHADTCSV\\Redirect$\\Teacher\\seino-ju\\Documents\\清野\\〓Table+1.2.3.4.5-2江夏1017修正.xlsx" \l "'Table 3'!A2) | [±](\\\\IHADTCSV\\Redirect$\\Teacher\\seino-ju\\Documents\\清野\\〓Table+1.2.3.4.5-2江夏1017修正.xlsx" \l "'Table 3'!A2) | [75.8](\\\\IHADTCSV\\Redirect$\\Teacher\\seino-ju\\Documents\\清野\\〓Table+1.2.3.4.5-2江夏1017修正.xlsx" \l "'Table 3'!A2) |  | [113.5](\\\\IHADTCSV\\Redirect$\\Teacher\\seino-ju\\Documents\\清野\\〓Table+1.2.3.4.5-2江夏1017修正.xlsx" \l "'Table 3'!A2) | [±](\\\\IHADTCSV\\Redirect$\\Teacher\\seino-ju\\Documents\\清野\\〓Table+1.2.3.4.5-2江夏1017修正.xlsx" \l "'Table 3'!A2) | [61.6](\\\\IHADTCSV\\Redirect$\\Teacher\\seino-ju\\Documents\\清野\\〓Table+1.2.3.4.5-2江夏1017修正.xlsx" \l "'Table 3'!A2) |  | [137.4](\\\\IHADTCSV\\Redirect$\\Teacher\\seino-ju\\Documents\\清野\\〓Table+1.2.3.4.5-2江夏1017修正.xlsx" \l "'Table 3'!A2) | [±](\\\\IHADTCSV\\Redirect$\\Teacher\\seino-ju\\Documents\\清野\\〓Table+1.2.3.4.5-2江夏1017修正.xlsx" \l "'Table 3'!A2) | [75.5](\\\\IHADTCSV\\Redirect$\\Teacher\\seino-ju\\Documents\\清野\\〓Table+1.2.3.4.5-2江夏1017修正.xlsx" \l "'Table 3'!A2) |  |  | [174.5](\\\\IHADTCSV\\Redirect$\\Teacher\\seino-ju\\Documents\\清野\\〓Table+1.2.3.4.5-2江夏1017修正.xlsx" \l "'Table 3'!A2) | [±](\\\\IHADTCSV\\Redirect$\\Teacher\\seino-ju\\Documents\\清野\\〓Table+1.2.3.4.5-2江夏1017修正.xlsx" \l "'Table 3'!A2) | [95.7](\\\\IHADTCSV\\Redirect$\\Teacher\\seino-ju\\Documents\\清野\\〓Table+1.2.3.4.5-2江夏1017修正.xlsx" \l "'Table 3'!A2) |  | [150.2](\\\\IHADTCSV\\Redirect$\\Teacher\\seino-ju\\Documents\\清野\\〓Table+1.2.3.4.5-2江夏1017修正.xlsx" \l "'Table 3'!A2) | [±](\\\\IHADTCSV\\Redirect$\\Teacher\\seino-ju\\Documents\\清野\\〓Table+1.2.3.4.5-2江夏1017修正.xlsx" \l "'Table 3'!A2) | [106.9](\\\\IHADTCSV\\Redirect$\\Teacher\\seino-ju\\Documents\\清野\\〓Table+1.2.3.4.5-2江夏1017修正.xlsx" \l "'Table 3'!A2) |  | [163.4](\\\\IHADTCSV\\Redirect$\\Teacher\\seino-ju\\Documents\\清野\\〓Table+1.2.3.4.5-2江夏1017修正.xlsx" \l "'Table 3'!A2) | [±](\\\\IHADTCSV\\Redirect$\\Teacher\\seino-ju\\Documents\\清野\\〓Table+1.2.3.4.5-2江夏1017修正.xlsx" \l "'Table 3'!A2) | [78.2](\\\\IHADTCSV\\Redirect$\\Teacher\\seino-ju\\Documents\\清野\\〓Table+1.2.3.4.5-2江夏1017修正.xlsx" \l "'Table 3'!A2) |  |  | [0.127](\\\\IHADTCSV\\Redirect$\\Teacher\\seino-ju\\Documents\\清野\\〓Table+1.2.3.4.5-2江夏1017修正.xlsx" \l "'Table 3'!A2) |  |
|  | [Fruits (g)](\\\\IHADTCSV\\Redirect$\\Teacher\\seino-ju\\Documents\\清野\\〓Table+1.2.3.4.5-2江夏1017修正.xlsx" \l "'Table 3'!A2) | [195.2](\\\\IHADTCSV\\Redirect$\\Teacher\\seino-ju\\Documents\\清野\\〓Table+1.2.3.4.5-2江夏1017修正.xlsx" \l "'Table 3'!A2) | [±](\\\\IHADTCSV\\Redirect$\\Teacher\\seino-ju\\Documents\\清野\\〓Table+1.2.3.4.5-2江夏1017修正.xlsx" \l "'Table 3'!A2) | [146.1](\\\\IHADTCSV\\Redirect$\\Teacher\\seino-ju\\Documents\\清野\\〓Table+1.2.3.4.5-2江夏1017修正.xlsx" \l "'Table 3'!A2) |  | [306.0](\\\\IHADTCSV\\Redirect$\\Teacher\\seino-ju\\Documents\\清野\\〓Table+1.2.3.4.5-2江夏1017修正.xlsx" \l "'Table 3'!A2) | [±](\\\\IHADTCSV\\Redirect$\\Teacher\\seino-ju\\Documents\\清野\\〓Table+1.2.3.4.5-2江夏1017修正.xlsx" \l "'Table 3'!A2) | [196.2](\\\\IHADTCSV\\Redirect$\\Teacher\\seino-ju\\Documents\\清野\\〓Table+1.2.3.4.5-2江夏1017修正.xlsx" \l "'Table 3'!A2) |  | [221.4](\\\\IHADTCSV\\Redirect$\\Teacher\\seino-ju\\Documents\\清野\\〓Table+1.2.3.4.5-2江夏1017修正.xlsx" \l "'Table 3'!A2) | [±](\\\\IHADTCSV\\Redirect$\\Teacher\\seino-ju\\Documents\\清野\\〓Table+1.2.3.4.5-2江夏1017修正.xlsx" \l "'Table 3'!A2) | [147.8](\\\\IHADTCSV\\Redirect$\\Teacher\\seino-ju\\Documents\\清野\\〓Table+1.2.3.4.5-2江夏1017修正.xlsx" \l "'Table 3'!A2) |  |  | [133.2](\\\\IHADTCSV\\Redirect$\\Teacher\\seino-ju\\Documents\\清野\\〓Table+1.2.3.4.5-2江夏1017修正.xlsx" \l "'Table 3'!A2) | [±](\\\\IHADTCSV\\Redirect$\\Teacher\\seino-ju\\Documents\\清野\\〓Table+1.2.3.4.5-2江夏1017修正.xlsx" \l "'Table 3'!A2) | [152.4](\\\\IHADTCSV\\Redirect$\\Teacher\\seino-ju\\Documents\\清野\\〓Table+1.2.3.4.5-2江夏1017修正.xlsx" \l "'Table 3'!A2) |  | [215.3](\\\\IHADTCSV\\Redirect$\\Teacher\\seino-ju\\Documents\\清野\\〓Table+1.2.3.4.5-2江夏1017修正.xlsx" \l "'Table 3'!A2) | [±](\\\\IHADTCSV\\Redirect$\\Teacher\\seino-ju\\Documents\\清野\\〓Table+1.2.3.4.5-2江夏1017修正.xlsx" \l "'Table 3'!A2) | [208.6](\\\\IHADTCSV\\Redirect$\\Teacher\\seino-ju\\Documents\\清野\\〓Table+1.2.3.4.5-2江夏1017修正.xlsx" \l "'Table 3'!A2) |  | [180.5](\\\\IHADTCSV\\Redirect$\\Teacher\\seino-ju\\Documents\\清野\\〓Table+1.2.3.4.5-2江夏1017修正.xlsx" \l "'Table 3'!A2) | [±](\\\\IHADTCSV\\Redirect$\\Teacher\\seino-ju\\Documents\\清野\\〓Table+1.2.3.4.5-2江夏1017修正.xlsx" \l "'Table 3'!A2) | [139.9](\\\\IHADTCSV\\Redirect$\\Teacher\\seino-ju\\Documents\\清野\\〓Table+1.2.3.4.5-2江夏1017修正.xlsx" \l "'Table 3'!A2) |  |  | [0.261](\\\\IHADTCSV\\Redirect$\\Teacher\\seino-ju\\Documents\\清野\\〓Table+1.2.3.4.5-2江夏1017修正.xlsx" \l "'Table 3'!A2) |  |
|  | [Fish and shellfish (g)](\\\\IHADTCSV\\Redirect$\\Teacher\\seino-ju\\Documents\\清野\\〓Table+1.2.3.4.5-2江夏1017修正.xlsx" \l "'Table 3'!A2) | [48.0](\\\\IHADTCSV\\Redirect$\\Teacher\\seino-ju\\Documents\\清野\\〓Table+1.2.3.4.5-2江夏1017修正.xlsx" \l "'Table 3'!A2) | [±](\\\\IHADTCSV\\Redirect$\\Teacher\\seino-ju\\Documents\\清野\\〓Table+1.2.3.4.5-2江夏1017修正.xlsx" \l "'Table 3'!A2) | [29.5](\\\\IHADTCSV\\Redirect$\\Teacher\\seino-ju\\Documents\\清野\\〓Table+1.2.3.4.5-2江夏1017修正.xlsx" \l "'Table 3'!A2) |  | [64.7](\\\\IHADTCSV\\Redirect$\\Teacher\\seino-ju\\Documents\\清野\\〓Table+1.2.3.4.5-2江夏1017修正.xlsx" \l "'Table 3'!A2) | [±](\\\\IHADTCSV\\Redirect$\\Teacher\\seino-ju\\Documents\\清野\\〓Table+1.2.3.4.5-2江夏1017修正.xlsx" \l "'Table 3'!A2) | [41.2](\\\\IHADTCSV\\Redirect$\\Teacher\\seino-ju\\Documents\\清野\\〓Table+1.2.3.4.5-2江夏1017修正.xlsx" \l "'Table 3'!A2) |  | [62.9](\\\\IHADTCSV\\Redirect$\\Teacher\\seino-ju\\Documents\\清野\\〓Table+1.2.3.4.5-2江夏1017修正.xlsx" \l "'Table 3'!A2) | [±](\\\\IHADTCSV\\Redirect$\\Teacher\\seino-ju\\Documents\\清野\\〓Table+1.2.3.4.5-2江夏1017修正.xlsx" \l "'Table 3'!A2) | [44.3](\\\\IHADTCSV\\Redirect$\\Teacher\\seino-ju\\Documents\\清野\\〓Table+1.2.3.4.5-2江夏1017修正.xlsx" \l "'Table 3'!A2) |  |  | [37.2](\\\\IHADTCSV\\Redirect$\\Teacher\\seino-ju\\Documents\\清野\\〓Table+1.2.3.4.5-2江夏1017修正.xlsx" \l "'Table 3'!A2) | [±](\\\\IHADTCSV\\Redirect$\\Teacher\\seino-ju\\Documents\\清野\\〓Table+1.2.3.4.5-2江夏1017修正.xlsx" \l "'Table 3'!A2) | [30.8](\\\\IHADTCSV\\Redirect$\\Teacher\\seino-ju\\Documents\\清野\\〓Table+1.2.3.4.5-2江夏1017修正.xlsx" \l "'Table 3'!A2) |  | [51.3](\\\\IHADTCSV\\Redirect$\\Teacher\\seino-ju\\Documents\\清野\\〓Table+1.2.3.4.5-2江夏1017修正.xlsx" \l "'Table 3'!A2) | [±](\\\\IHADTCSV\\Redirect$\\Teacher\\seino-ju\\Documents\\清野\\〓Table+1.2.3.4.5-2江夏1017修正.xlsx" \l "'Table 3'!A2) | [38.6](\\\\IHADTCSV\\Redirect$\\Teacher\\seino-ju\\Documents\\清野\\〓Table+1.2.3.4.5-2江夏1017修正.xlsx" \l "'Table 3'!A2) |  | [71.2](\\\\IHADTCSV\\Redirect$\\Teacher\\seino-ju\\Documents\\清野\\〓Table+1.2.3.4.5-2江夏1017修正.xlsx" \l "'Table 3'!A2) | [±](\\\\IHADTCSV\\Redirect$\\Teacher\\seino-ju\\Documents\\清野\\〓Table+1.2.3.4.5-2江夏1017修正.xlsx" \l "'Table 3'!A2) | [76.2](\\\\IHADTCSV\\Redirect$\\Teacher\\seino-ju\\Documents\\清野\\〓Table+1.2.3.4.5-2江夏1017修正.xlsx" \l "'Table 3'!A2) |  |  | [0.330](\\\\IHADTCSV\\Redirect$\\Teacher\\seino-ju\\Documents\\清野\\〓Table+1.2.3.4.5-2江夏1017修正.xlsx" \l "'Table 3'!A2) |  |
|  | [Meats (g)](\\\\IHADTCSV\\Redirect$\\Teacher\\seino-ju\\Documents\\清野\\〓Table+1.2.3.4.5-2江夏1017修正.xlsx" \l "'Table 3'!A2) | [104.2](\\\\IHADTCSV\\Redirect$\\Teacher\\seino-ju\\Documents\\清野\\〓Table+1.2.3.4.5-2江夏1017修正.xlsx" \l "'Table 3'!A2) | [±](\\\\IHADTCSV\\Redirect$\\Teacher\\seino-ju\\Documents\\清野\\〓Table+1.2.3.4.5-2江夏1017修正.xlsx" \l "'Table 3'!A2) | [46.1](\\\\IHADTCSV\\Redirect$\\Teacher\\seino-ju\\Documents\\清野\\〓Table+1.2.3.4.5-2江夏1017修正.xlsx" \l "'Table 3'!A2) |  | [111.8](\\\\IHADTCSV\\Redirect$\\Teacher\\seino-ju\\Documents\\清野\\〓Table+1.2.3.4.5-2江夏1017修正.xlsx" \l "'Table 3'!A2) | [±](\\\\IHADTCSV\\Redirect$\\Teacher\\seino-ju\\Documents\\清野\\〓Table+1.2.3.4.5-2江夏1017修正.xlsx" \l "'Table 3'!A2) | [33.4](\\\\IHADTCSV\\Redirect$\\Teacher\\seino-ju\\Documents\\清野\\〓Table+1.2.3.4.5-2江夏1017修正.xlsx" \l "'Table 3'!A2) |  | [122.2](\\\\IHADTCSV\\Redirect$\\Teacher\\seino-ju\\Documents\\清野\\〓Table+1.2.3.4.5-2江夏1017修正.xlsx" \l "'Table 3'!A2) | [±](\\\\IHADTCSV\\Redirect$\\Teacher\\seino-ju\\Documents\\清野\\〓Table+1.2.3.4.5-2江夏1017修正.xlsx" \l "'Table 3'!A2) | [42.9](\\\\IHADTCSV\\Redirect$\\Teacher\\seino-ju\\Documents\\清野\\〓Table+1.2.3.4.5-2江夏1017修正.xlsx" \l "'Table 3'!A2) |  |  | [156.2](\\\\IHADTCSV\\Redirect$\\Teacher\\seino-ju\\Documents\\清野\\〓Table+1.2.3.4.5-2江夏1017修正.xlsx" \l "'Table 3'!A2) | [±](\\\\IHADTCSV\\Redirect$\\Teacher\\seino-ju\\Documents\\清野\\〓Table+1.2.3.4.5-2江夏1017修正.xlsx" \l "'Table 3'!A2) | [86.9](\\\\IHADTCSV\\Redirect$\\Teacher\\seino-ju\\Documents\\清野\\〓Table+1.2.3.4.5-2江夏1017修正.xlsx" \l "'Table 3'!A2) |  | [134.5](\\\\IHADTCSV\\Redirect$\\Teacher\\seino-ju\\Documents\\清野\\〓Table+1.2.3.4.5-2江夏1017修正.xlsx" \l "'Table 3'!A2) | [±](\\\\IHADTCSV\\Redirect$\\Teacher\\seino-ju\\Documents\\清野\\〓Table+1.2.3.4.5-2江夏1017修正.xlsx" \l "'Table 3'!A2) | [60.1](\\\\IHADTCSV\\Redirect$\\Teacher\\seino-ju\\Documents\\清野\\〓Table+1.2.3.4.5-2江夏1017修正.xlsx" \l "'Table 3'!A2) |  | [153.8](\\\\IHADTCSV\\Redirect$\\Teacher\\seino-ju\\Documents\\清野\\〓Table+1.2.3.4.5-2江夏1017修正.xlsx" \l "'Table 3'!A2) | [±](\\\\IHADTCSV\\Redirect$\\Teacher\\seino-ju\\Documents\\清野\\〓Table+1.2.3.4.5-2江夏1017修正.xlsx" \l "'Table 3'!A2) | [87.9](\\\\IHADTCSV\\Redirect$\\Teacher\\seino-ju\\Documents\\清野\\〓Table+1.2.3.4.5-2江夏1017修正.xlsx" \l "'Table 3'!A2) |  |  | [0.043](\\\\IHADTCSV\\Redirect$\\Teacher\\seino-ju\\Documents\\清野\\〓Table+1.2.3.4.5-2江夏1017修正.xlsx" \l "'Table 3'!A2) | [*](\\\\IHADTCSV\\Redirect$\\Teacher\\seino-ju\\Documents\\清野\\〓Table+1.2.3.4.5-2江夏1017修正.xlsx" \l "'Table 3'!A2) |
|  | [Eggs (g)](\\\\IHADTCSV\\Redirect$\\Teacher\\seino-ju\\Documents\\清野\\〓Table+1.2.3.4.5-2江夏1017修正.xlsx" \l "'Table 3'!A2) | [57.6](\\\\IHADTCSV\\Redirect$\\Teacher\\seino-ju\\Documents\\清野\\〓Table+1.2.3.4.5-2江夏1017修正.xlsx" \l "'Table 3'!A2) | [±](\\\\IHADTCSV\\Redirect$\\Teacher\\seino-ju\\Documents\\清野\\〓Table+1.2.3.4.5-2江夏1017修正.xlsx" \l "'Table 3'!A2) | [50.9](\\\\IHADTCSV\\Redirect$\\Teacher\\seino-ju\\Documents\\清野\\〓Table+1.2.3.4.5-2江夏1017修正.xlsx" \l "'Table 3'!A2) |  | [60.1](\\\\IHADTCSV\\Redirect$\\Teacher\\seino-ju\\Documents\\清野\\〓Table+1.2.3.4.5-2江夏1017修正.xlsx" \l "'Table 3'!A2) | [±](\\\\IHADTCSV\\Redirect$\\Teacher\\seino-ju\\Documents\\清野\\〓Table+1.2.3.4.5-2江夏1017修正.xlsx" \l "'Table 3'!A2) | [53.6](\\\\IHADTCSV\\Redirect$\\Teacher\\seino-ju\\Documents\\清野\\〓Table+1.2.3.4.5-2江夏1017修正.xlsx" \l "'Table 3'!A2) |  | [62.9](\\\\IHADTCSV\\Redirect$\\Teacher\\seino-ju\\Documents\\清野\\〓Table+1.2.3.4.5-2江夏1017修正.xlsx" \l "'Table 3'!A2) | [±](\\\\IHADTCSV\\Redirect$\\Teacher\\seino-ju\\Documents\\清野\\〓Table+1.2.3.4.5-2江夏1017修正.xlsx" \l "'Table 3'!A2) | [50.7](\\\\IHADTCSV\\Redirect$\\Teacher\\seino-ju\\Documents\\清野\\〓Table+1.2.3.4.5-2江夏1017修正.xlsx" \l "'Table 3'!A2) |  |  | [65.8](\\\\IHADTCSV\\Redirect$\\Teacher\\seino-ju\\Documents\\清野\\〓Table+1.2.3.4.5-2江夏1017修正.xlsx" \l "'Table 3'!A2) | [±](\\\\IHADTCSV\\Redirect$\\Teacher\\seino-ju\\Documents\\清野\\〓Table+1.2.3.4.5-2江夏1017修正.xlsx" \l "'Table 3'!A2) | [36.4](\\\\IHADTCSV\\Redirect$\\Teacher\\seino-ju\\Documents\\清野\\〓Table+1.2.3.4.5-2江夏1017修正.xlsx" \l "'Table 3'!A2) |  | [65.0](\\\\IHADTCSV\\Redirect$\\Teacher\\seino-ju\\Documents\\清野\\〓Table+1.2.3.4.5-2江夏1017修正.xlsx" \l "'Table 3'!A2) | [±](\\\\IHADTCSV\\Redirect$\\Teacher\\seino-ju\\Documents\\清野\\〓Table+1.2.3.4.5-2江夏1017修正.xlsx" \l "'Table 3'!A2) | [49.3](\\\\IHADTCSV\\Redirect$\\Teacher\\seino-ju\\Documents\\清野\\〓Table+1.2.3.4.5-2江夏1017修正.xlsx" \l "'Table 3'!A2) |  | [68.2](\\\\IHADTCSV\\Redirect$\\Teacher\\seino-ju\\Documents\\清野\\〓Table+1.2.3.4.5-2江夏1017修正.xlsx" \l "'Table 3'!A2) | [±](\\\\IHADTCSV\\Redirect$\\Teacher\\seino-ju\\Documents\\清野\\〓Table+1.2.3.4.5-2江夏1017修正.xlsx" \l "'Table 3'!A2) | [41.8](\\\\IHADTCSV\\Redirect$\\Teacher\\seino-ju\\Documents\\清野\\〓Table+1.2.3.4.5-2江夏1017修正.xlsx" \l "'Table 3'!A2) |  |  | [0.606](\\\\IHADTCSV\\Redirect$\\Teacher\\seino-ju\\Documents\\清野\\〓Table+1.2.3.4.5-2江夏1017修正.xlsx" \l "'Table 3'!A2) |  |
|  | [Dairy products (g)](\\\\IHADTCSV\\Redirect$\\Teacher\\seino-ju\\Documents\\清野\\〓Table+1.2.3.4.5-2江夏1017修正.xlsx" \l "'Table 3'!A2) | [183.3](\\\\IHADTCSV\\Redirect$\\Teacher\\seino-ju\\Documents\\清野\\〓Table+1.2.3.4.5-2江夏1017修正.xlsx" \l "'Table 3'!A2) | [±](\\\\IHADTCSV\\Redirect$\\Teacher\\seino-ju\\Documents\\清野\\〓Table+1.2.3.4.5-2江夏1017修正.xlsx" \l "'Table 3'!A2) | [167.9](\\\\IHADTCSV\\Redirect$\\Teacher\\seino-ju\\Documents\\清野\\〓Table+1.2.3.4.5-2江夏1017修正.xlsx" \l "'Table 3'!A2) |  | [257.0](\\\\IHADTCSV\\Redirect$\\Teacher\\seino-ju\\Documents\\清野\\〓Table+1.2.3.4.5-2江夏1017修正.xlsx" \l "'Table 3'!A2) | [±](\\\\IHADTCSV\\Redirect$\\Teacher\\seino-ju\\Documents\\清野\\〓Table+1.2.3.4.5-2江夏1017修正.xlsx" \l "'Table 3'!A2) | [147.0](\\\\IHADTCSV\\Redirect$\\Teacher\\seino-ju\\Documents\\清野\\〓Table+1.2.3.4.5-2江夏1017修正.xlsx" \l "'Table 3'!A2) |  | [219.7](\\\\IHADTCSV\\Redirect$\\Teacher\\seino-ju\\Documents\\清野\\〓Table+1.2.3.4.5-2江夏1017修正.xlsx" \l "'Table 3'!A2) | [±](\\\\IHADTCSV\\Redirect$\\Teacher\\seino-ju\\Documents\\清野\\〓Table+1.2.3.4.5-2江夏1017修正.xlsx" \l "'Table 3'!A2) | [146.4](\\\\IHADTCSV\\Redirect$\\Teacher\\seino-ju\\Documents\\清野\\〓Table+1.2.3.4.5-2江夏1017修正.xlsx" \l "'Table 3'!A2) |  |  | [177.3](\\\\IHADTCSV\\Redirect$\\Teacher\\seino-ju\\Documents\\清野\\〓Table+1.2.3.4.5-2江夏1017修正.xlsx" \l "'Table 3'!A2) | [±](\\\\IHADTCSV\\Redirect$\\Teacher\\seino-ju\\Documents\\清野\\〓Table+1.2.3.4.5-2江夏1017修正.xlsx" \l "'Table 3'!A2) | [93.3](\\\\IHADTCSV\\Redirect$\\Teacher\\seino-ju\\Documents\\清野\\〓Table+1.2.3.4.5-2江夏1017修正.xlsx" \l "'Table 3'!A2) |  | [262.6](\\\\IHADTCSV\\Redirect$\\Teacher\\seino-ju\\Documents\\清野\\〓Table+1.2.3.4.5-2江夏1017修正.xlsx" \l "'Table 3'!A2) | [±](\\\\IHADTCSV\\Redirect$\\Teacher\\seino-ju\\Documents\\清野\\〓Table+1.2.3.4.5-2江夏1017修正.xlsx" \l "'Table 3'!A2) | [134.4](\\\\IHADTCSV\\Redirect$\\Teacher\\seino-ju\\Documents\\清野\\〓Table+1.2.3.4.5-2江夏1017修正.xlsx" \l "'Table 3'!A2) |  | [184.8](\\\\IHADTCSV\\Redirect$\\Teacher\\seino-ju\\Documents\\清野\\〓Table+1.2.3.4.5-2江夏1017修正.xlsx" \l "'Table 3'!A2) | [±](\\\\IHADTCSV\\Redirect$\\Teacher\\seino-ju\\Documents\\清野\\〓Table+1.2.3.4.5-2江夏1017修正.xlsx" \l "'Table 3'!A2) | [95.7](\\\\IHADTCSV\\Redirect$\\Teacher\\seino-ju\\Documents\\清野\\〓Table+1.2.3.4.5-2江夏1017修正.xlsx" \l "'Table 3'!A2) |  |  | [0.900](\\\\IHADTCSV\\Redirect$\\Teacher\\seino-ju\\Documents\\清野\\〓Table+1.2.3.4.5-2江夏1017修正.xlsx" \l "'Table 3'!A2) |  |
|  | [Fats and oils (g)](\\\\IHADTCSV\\Redirect$\\Teacher\\seino-ju\\Documents\\清野\\〓Table+1.2.3.4.5-2江夏1017修正.xlsx" \l "'Table 3'!A2) | [16.4](\\\\IHADTCSV\\Redirect$\\Teacher\\seino-ju\\Documents\\清野\\〓Table+1.2.3.4.5-2江夏1017修正.xlsx" \l "'Table 3'!A2) | [±](\\\\IHADTCSV\\Redirect$\\Teacher\\seino-ju\\Documents\\清野\\〓Table+1.2.3.4.5-2江夏1017修正.xlsx" \l "'Table 3'!A2) | [4.4](\\\\IHADTCSV\\Redirect$\\Teacher\\seino-ju\\Documents\\清野\\〓Table+1.2.3.4.5-2江夏1017修正.xlsx" \l "'Table 3'!A2) |  | [15.6](\\\\IHADTCSV\\Redirect$\\Teacher\\seino-ju\\Documents\\清野\\〓Table+1.2.3.4.5-2江夏1017修正.xlsx" \l "'Table 3'!A2) | [±](\\\\IHADTCSV\\Redirect$\\Teacher\\seino-ju\\Documents\\清野\\〓Table+1.2.3.4.5-2江夏1017修正.xlsx" \l "'Table 3'!A2) | [5.5](\\\\IHADTCSV\\Redirect$\\Teacher\\seino-ju\\Documents\\清野\\〓Table+1.2.3.4.5-2江夏1017修正.xlsx" \l "'Table 3'!A2) |  | [16.8](\\\\IHADTCSV\\Redirect$\\Teacher\\seino-ju\\Documents\\清野\\〓Table+1.2.3.4.5-2江夏1017修正.xlsx" \l "'Table 3'!A2) | [±](\\\\IHADTCSV\\Redirect$\\Teacher\\seino-ju\\Documents\\清野\\〓Table+1.2.3.4.5-2江夏1017修正.xlsx" \l "'Table 3'!A2) | [6.6](\\\\IHADTCSV\\Redirect$\\Teacher\\seino-ju\\Documents\\清野\\〓Table+1.2.3.4.5-2江夏1017修正.xlsx" \l "'Table 3'!A2) |  |  | [23.7](\\\\IHADTCSV\\Redirect$\\Teacher\\seino-ju\\Documents\\清野\\〓Table+1.2.3.4.5-2江夏1017修正.xlsx" \l "'Table 3'!A2) | [±](\\\\IHADTCSV\\Redirect$\\Teacher\\seino-ju\\Documents\\清野\\〓Table+1.2.3.4.5-2江夏1017修正.xlsx" \l "'Table 3'!A2) | [8.3](\\\\IHADTCSV\\Redirect$\\Teacher\\seino-ju\\Documents\\清野\\〓Table+1.2.3.4.5-2江夏1017修正.xlsx" \l "'Table 3'!A2) |  | [20.7](\\\\IHADTCSV\\Redirect$\\Teacher\\seino-ju\\Documents\\清野\\〓Table+1.2.3.4.5-2江夏1017修正.xlsx" \l "'Table 3'!A2) | [±](\\\\IHADTCSV\\Redirect$\\Teacher\\seino-ju\\Documents\\清野\\〓Table+1.2.3.4.5-2江夏1017修正.xlsx" \l "'Table 3'!A2) | [7.8](\\\\IHADTCSV\\Redirect$\\Teacher\\seino-ju\\Documents\\清野\\〓Table+1.2.3.4.5-2江夏1017修正.xlsx" \l "'Table 3'!A2) |  | [18.7](\\\\IHADTCSV\\Redirect$\\Teacher\\seino-ju\\Documents\\清野\\〓Table+1.2.3.4.5-2江夏1017修正.xlsx" \l "'Table 3'!A2) | [±](\\\\IHADTCSV\\Redirect$\\Teacher\\seino-ju\\Documents\\清野\\〓Table+1.2.3.4.5-2江夏1017修正.xlsx" \l "'Table 3'!A2) | [12.1](\\\\IHADTCSV\\Redirect$\\Teacher\\seino-ju\\Documents\\清野\\〓Table+1.2.3.4.5-2江夏1017修正.xlsx" \l "'Table 3'!A2) |  |  | [0.004](\\\\IHADTCSV\\Redirect$\\Teacher\\seino-ju\\Documents\\清野\\〓Table+1.2.3.4.5-2江夏1017修正.xlsx" \l "'Table 3'!A2) | [*](\\\\IHADTCSV\\Redirect$\\Teacher\\seino-ju\\Documents\\清野\\〓Table+1.2.3.4.5-2江夏1017修正.xlsx" \l "'Table 3'!A2) |
|  | [Confectioneries(g)](\\\\IHADTCSV\\Redirect$\\Teacher\\seino-ju\\Documents\\清野\\〓Table+1.2.3.4.5-2江夏1017修正.xlsx" \l "'Table 3'!A2) | [11.5](\\\\IHADTCSV\\Redirect$\\Teacher\\seino-ju\\Documents\\清野\\〓Table+1.2.3.4.5-2江夏1017修正.xlsx" \l "'Table 3'!A2) | [±](\\\\IHADTCSV\\Redirect$\\Teacher\\seino-ju\\Documents\\清野\\〓Table+1.2.3.4.5-2江夏1017修正.xlsx" \l "'Table 3'!A2) | [11.2](\\\\IHADTCSV\\Redirect$\\Teacher\\seino-ju\\Documents\\清野\\〓Table+1.2.3.4.5-2江夏1017修正.xlsx" \l "'Table 3'!A2) |  | [7.4](\\\\IHADTCSV\\Redirect$\\Teacher\\seino-ju\\Documents\\清野\\〓Table+1.2.3.4.5-2江夏1017修正.xlsx" \l "'Table 3'!A2) | [±](\\\\IHADTCSV\\Redirect$\\Teacher\\seino-ju\\Documents\\清野\\〓Table+1.2.3.4.5-2江夏1017修正.xlsx" \l "'Table 3'!A2) | [9.5](\\\\IHADTCSV\\Redirect$\\Teacher\\seino-ju\\Documents\\清野\\〓Table+1.2.3.4.5-2江夏1017修正.xlsx" \l "'Table 3'!A2) |  | [14.0](\\\\IHADTCSV\\Redirect$\\Teacher\\seino-ju\\Documents\\清野\\〓Table+1.2.3.4.5-2江夏1017修正.xlsx" \l "'Table 3'!A2) | [±](\\\\IHADTCSV\\Redirect$\\Teacher\\seino-ju\\Documents\\清野\\〓Table+1.2.3.4.5-2江夏1017修正.xlsx" \l "'Table 3'!A2) | [16.1](\\\\IHADTCSV\\Redirect$\\Teacher\\seino-ju\\Documents\\清野\\〓Table+1.2.3.4.5-2江夏1017修正.xlsx" \l "'Table 3'!A2) |  |  | [25.6](\\\\IHADTCSV\\Redirect$\\Teacher\\seino-ju\\Documents\\清野\\〓Table+1.2.3.4.5-2江夏1017修正.xlsx" \l "'Table 3'!A2) | [±](\\\\IHADTCSV\\Redirect$\\Teacher\\seino-ju\\Documents\\清野\\〓Table+1.2.3.4.5-2江夏1017修正.xlsx" \l "'Table 3'!A2) | [52.5](\\\\IHADTCSV\\Redirect$\\Teacher\\seino-ju\\Documents\\清野\\〓Table+1.2.3.4.5-2江夏1017修正.xlsx" \l "'Table 3'!A2) |  | [12.8](\\\\IHADTCSV\\Redirect$\\Teacher\\seino-ju\\Documents\\清野\\〓Table+1.2.3.4.5-2江夏1017修正.xlsx" \l "'Table 3'!A2) | [±](\\\\IHADTCSV\\Redirect$\\Teacher\\seino-ju\\Documents\\清野\\〓Table+1.2.3.4.5-2江夏1017修正.xlsx" \l "'Table 3'!A2) | [23.7](\\\\IHADTCSV\\Redirect$\\Teacher\\seino-ju\\Documents\\清野\\〓Table+1.2.3.4.5-2江夏1017修正.xlsx" \l "'Table 3'!A2) |  | [18.8](\\\\IHADTCSV\\Redirect$\\Teacher\\seino-ju\\Documents\\清野\\〓Table+1.2.3.4.5-2江夏1017修正.xlsx" \l "'Table 3'!A2) | [±](\\\\IHADTCSV\\Redirect$\\Teacher\\seino-ju\\Documents\\清野\\〓Table+1.2.3.4.5-2江夏1017修正.xlsx" \l "'Table 3'!A2) | [22.5](\\\\IHADTCSV\\Redirect$\\Teacher\\seino-ju\\Documents\\清野\\〓Table+1.2.3.4.5-2江夏1017修正.xlsx" \l "'Table 3'!A2) |  |  | [0.333](\\\\IHADTCSV\\Redirect$\\Teacher\\seino-ju\\Documents\\清野\\〓Table+1.2.3.4.5-2江夏1017修正.xlsx" \l "'Table 3'!A2) |  |
|  | [Beverages (g)](\\\\IHADTCSV\\Redirect$\\Teacher\\seino-ju\\Documents\\清野\\〓Table+1.2.3.4.5-2江夏1017修正.xlsx" \l "'Table 3'!A2) | [445.7](\\\\IHADTCSV\\Redirect$\\Teacher\\seino-ju\\Documents\\清野\\〓Table+1.2.3.4.5-2江夏1017修正.xlsx" \l "'Table 3'!A2) | [±](\\\\IHADTCSV\\Redirect$\\Teacher\\seino-ju\\Documents\\清野\\〓Table+1.2.3.4.5-2江夏1017修正.xlsx" \l "'Table 3'!A2) | [289.3](\\\\IHADTCSV\\Redirect$\\Teacher\\seino-ju\\Documents\\清野\\〓Table+1.2.3.4.5-2江夏1017修正.xlsx" \l "'Table 3'!A2) |  | [656.5](\\\\IHADTCSV\\Redirect$\\Teacher\\seino-ju\\Documents\\清野\\〓Table+1.2.3.4.5-2江夏1017修正.xlsx" \l "'Table 3'!A2) | [±](\\\\IHADTCSV\\Redirect$\\Teacher\\seino-ju\\Documents\\清野\\〓Table+1.2.3.4.5-2江夏1017修正.xlsx" \l "'Table 3'!A2) | [443.9](\\\\IHADTCSV\\Redirect$\\Teacher\\seino-ju\\Documents\\清野\\〓Table+1.2.3.4.5-2江夏1017修正.xlsx" \l "'Table 3'!A2) |  | [529.1](\\\\IHADTCSV\\Redirect$\\Teacher\\seino-ju\\Documents\\清野\\〓Table+1.2.3.4.5-2江夏1017修正.xlsx" \l "'Table 3'!A2) | [±](\\\\IHADTCSV\\Redirect$\\Teacher\\seino-ju\\Documents\\清野\\〓Table+1.2.3.4.5-2江夏1017修正.xlsx" \l "'Table 3'!A2) | [518.1](\\\\IHADTCSV\\Redirect$\\Teacher\\seino-ju\\Documents\\清野\\〓Table+1.2.3.4.5-2江夏1017修正.xlsx" \l "'Table 3'!A2) |  |  | [375.9](\\\\IHADTCSV\\Redirect$\\Teacher\\seino-ju\\Documents\\清野\\〓Table+1.2.3.4.5-2江夏1017修正.xlsx" \l "'Table 3'!A2) | [±](\\\\IHADTCSV\\Redirect$\\Teacher\\seino-ju\\Documents\\清野\\〓Table+1.2.3.4.5-2江夏1017修正.xlsx" \l "'Table 3'!A2) | [318.7](\\\\IHADTCSV\\Redirect$\\Teacher\\seino-ju\\Documents\\清野\\〓Table+1.2.3.4.5-2江夏1017修正.xlsx" \l "'Table 3'!A2) |  | [482.4](\\\\IHADTCSV\\Redirect$\\Teacher\\seino-ju\\Documents\\清野\\〓Table+1.2.3.4.5-2江夏1017修正.xlsx" \l "'Table 3'!A2) | [±](\\\\IHADTCSV\\Redirect$\\Teacher\\seino-ju\\Documents\\清野\\〓Table+1.2.3.4.5-2江夏1017修正.xlsx" \l "'Table 3'!A2) | [463.8](\\\\IHADTCSV\\Redirect$\\Teacher\\seino-ju\\Documents\\清野\\〓Table+1.2.3.4.5-2江夏1017修正.xlsx" \l "'Table 3'!A2) |  | [382.5](\\\\IHADTCSV\\Redirect$\\Teacher\\seino-ju\\Documents\\清野\\〓Table+1.2.3.4.5-2江夏1017修正.xlsx" \l "'Table 3'!A2) | [±](\\\\IHADTCSV\\Redirect$\\Teacher\\seino-ju\\Documents\\清野\\〓Table+1.2.3.4.5-2江夏1017修正.xlsx" \l "'Table 3'!A2) | [351.1](\\\\IHADTCSV\\Redirect$\\Teacher\\seino-ju\\Documents\\清野\\〓Table+1.2.3.4.5-2江夏1017修正.xlsx" \l "'Table 3'!A2) |  |  | [0.532](\\\\IHADTCSV\\Redirect$\\Teacher\\seino-ju\\Documents\\清野\\〓Table+1.2.3.4.5-2江夏1017修正.xlsx" \l "'Table 3'!A2) |  |
|  | [Seasonings and spices (g)](\\\\IHADTCSV\\Redirect$\\Teacher\\seino-ju\\Documents\\清野\\〓Table+1.2.3.4.5-2江夏1017修正.xlsx" \l "'Table 3'!A2) | [174.6](\\\\IHADTCSV\\Redirect$\\Teacher\\seino-ju\\Documents\\清野\\〓Table+1.2.3.4.5-2江夏1017修正.xlsx" \l "'Table 3'!A2) | [±](\\\\IHADTCSV\\Redirect$\\Teacher\\seino-ju\\Documents\\清野\\〓Table+1.2.3.4.5-2江夏1017修正.xlsx" \l "'Table 3'!A2) | [147.9](\\\\IHADTCSV\\Redirect$\\Teacher\\seino-ju\\Documents\\清野\\〓Table+1.2.3.4.5-2江夏1017修正.xlsx" \l "'Table 3'!A2) |  | [298.0](\\\\IHADTCSV\\Redirect$\\Teacher\\seino-ju\\Documents\\清野\\〓Table+1.2.3.4.5-2江夏1017修正.xlsx" \l "'Table 3'!A2) | [±](\\\\IHADTCSV\\Redirect$\\Teacher\\seino-ju\\Documents\\清野\\〓Table+1.2.3.4.5-2江夏1017修正.xlsx" \l "'Table 3'!A2) | [191.4](\\\\IHADTCSV\\Redirect$\\Teacher\\seino-ju\\Documents\\清野\\〓Table+1.2.3.4.5-2江夏1017修正.xlsx" \l "'Table 3'!A2) |  | [255.6](\\\\IHADTCSV\\Redirect$\\Teacher\\seino-ju\\Documents\\清野\\〓Table+1.2.3.4.5-2江夏1017修正.xlsx" \l "'Table 3'!A2) | [±](\\\\IHADTCSV\\Redirect$\\Teacher\\seino-ju\\Documents\\清野\\〓Table+1.2.3.4.5-2江夏1017修正.xlsx" \l "'Table 3'!A2) | [177.7](\\\\IHADTCSV\\Redirect$\\Teacher\\seino-ju\\Documents\\清野\\〓Table+1.2.3.4.5-2江夏1017修正.xlsx" \l "'Table 3'!A2) |  |  | [268.0](\\\\IHADTCSV\\Redirect$\\Teacher\\seino-ju\\Documents\\清野\\〓Table+1.2.3.4.5-2江夏1017修正.xlsx" \l "'Table 3'!A2) | [±](\\\\IHADTCSV\\Redirect$\\Teacher\\seino-ju\\Documents\\清野\\〓Table+1.2.3.4.5-2江夏1017修正.xlsx" \l "'Table 3'!A2) | [186.7](\\\\IHADTCSV\\Redirect$\\Teacher\\seino-ju\\Documents\\清野\\〓Table+1.2.3.4.5-2江夏1017修正.xlsx" \l "'Table 3'!A2) |  | [289.7](\\\\IHADTCSV\\Redirect$\\Teacher\\seino-ju\\Documents\\清野\\〓Table+1.2.3.4.5-2江夏1017修正.xlsx" \l "'Table 3'!A2) | [±](\\\\IHADTCSV\\Redirect$\\Teacher\\seino-ju\\Documents\\清野\\〓Table+1.2.3.4.5-2江夏1017修正.xlsx" \l "'Table 3'!A2) | [150.1](\\\\IHADTCSV\\Redirect$\\Teacher\\seino-ju\\Documents\\清野\\〓Table+1.2.3.4.5-2江夏1017修正.xlsx" \l "'Table 3'!A2) |  | [285.9](\\\\IHADTCSV\\Redirect$\\Teacher\\seino-ju\\Documents\\清野\\〓Table+1.2.3.4.5-2江夏1017修正.xlsx" \l "'Table 3'!A2) | [±](\\\\IHADTCSV\\Redirect$\\Teacher\\seino-ju\\Documents\\清野\\〓Table+1.2.3.4.5-2江夏1017修正.xlsx" \l "'Table 3'!A2) | [239.6](\\\\IHADTCSV\\Redirect$\\Teacher\\seino-ju\\Documents\\清野\\〓Table+1.2.3.4.5-2江夏1017修正.xlsx" \l "'Table 3'!A2) |  |  | [0.140](\\\\IHADTCSV\\Redirect$\\Teacher\\seino-ju\\Documents\\清野\\〓Table+1.2.3.4.5-2江夏1017修正.xlsx" \l "'Table 3'!A2) |  |

* *p* < 0.05: Significant difference

† No paired t-test was performed for differences between groups before the start of the study.

SD: Standard Deviation

BDHQ: Brief-type self-administered diet history questionnaire

**Table S4.** Results of between-group and within-group factor analyses of anthropometrics, SNK, and TSRQ

|  | |  | Grouping factor | |  | Within-group factor | | | | | | | | |
| --- | --- | --- | --- | --- | --- | --- | --- | --- | --- | --- | --- | --- | --- | --- |
|  | Reciprocal action Group  × Time *p*† | |  | Time Main Effects *p*† | | Immediately after － Before *p*‡ | | After three months － Before *p*‡ | | After three months － Immediately after *p*‡ | | Multiple  comparison test |
|  |  |  |  |
|  |  |  |  |
| **Anthropometric measurements** | |  |  |  |  |  |  |  |  |  |  |  |
|  | Age (y) |  | 0.993 |  |  | 0.099 |  |  |  |  |  |  |  |  |
|  | Height (cm) |  | 0.367 |  |  | 0.585 |  |  |  |  |  |  |  |  |
| Weight (kg) |  | 0.296 |  |  | 0.206 |  |  |  |  |  |  |  |  |
| Body fat (%) |  | 0.571 |  |  | 0.323 |  |  |  |  |  |  |  |  |
| Lean body mass (kg) |  | 0.253 |  |  | 0.154 |  |  |  |  |  |  |  |  |
| Lean body mass/m (kg) |  | 0.250 |  |  | 0.151 |  |  |  |  |  |  |  |  |
| **SNK** | |  |  |  |  |  |  |  |  |  |  |  |  |  |
| Total SNK score | | 0.510 |  |  | 0.004 | * | 0.003 | * | 0.078 |  | 1.000 |  | Before < Immediately after |
| Energy and refueling | | 0.711 |  |  | 0.122 |  |  |  |  |  |  |  |  |
| Hydration |  | 0.183 |  |  | 0.183 |  |  |  |  |  |  |  |  |
| Supplements |  | 0.884 |  |  | 0.698 |  |  |  |  |  |  |  |  |
| Protein |  | 0.200 |  |  | < 0.001 | * | 0.002 | * | 0.002 | * | 1.000 |  | Before < Immediately after Before < After three months |
| **TSRQ** | |  |  |  |  |  |  |  |  |  |  |  |  |  |
|  | Autonomous motivation subscale |  | 0.571 |  |  | 0.077 |  |  |  |  |  |  |  |  |
|  | Externally controlled motivation subscale |  | 0.313 |  |  | 0.058 |  |  |  |  |  |  |  |  |
|  | Nonmotivation subscale |  | 0.311 |  |  | 0.378 |  |  |  |  |  |  |  |  |
|  | Relative Autonomous Motivation Index |  | 0.095 |  |  | 0.057 |  |  |  |  |  |  |  |  |

* *p* < 0.05: Significant difference

† A two-way ANOVA was conducted on the between-group and within-group factors.

‡ Multiple comparison tests using the Bonferroni method were performed for before, after,

after three months for within-group factors.

< less than，> more than

SNK: Sports Nutrition Knowledge

TSRQ: Treatment Self-Regulation Questionnaire
